# Supplementary material
Source: publisher figshare collection journal article supplement (https://acs.figshare.com/ndownloader/files/3788005)
Supplement: Supplementary file 1 [file 3788005]

 
data_NIS-Py
 
_audit_creation_method            SHELXL-97
_chemical_name_systematic
;
 ?
;
_chemical_name_common      'N-iodosuccinimide/pyridine'
_chemical_melting_point           ?
_chemical_formula_moiety          
'C4 H4 I N O2, C5 H5 N'

_chemical_formula_sum
 'C9 H9 I N2 O2'
_chemical_formula_weight          304.08
 
loop_
 _atom_type_symbol
 _atom_type_description
 _atom_type_scat_dispersion_real
 _atom_type_scat_dispersion_imag
 _atom_type_scat_source
 'C'  'C'   0.0033   0.0016
 'International Tables Vol C Tables 4.2.6.8 and 6.1.1.4'
 'H'  'H'   0.0000   0.0000
 'International Tables Vol C Tables 4.2.6.8 and 6.1.1.4'
 'N'  'N'   0.0061   0.0033
 'International Tables Vol C Tables 4.2.6.8 and 6.1.1.4'
 'O'  'O'   0.0106   0.0060
 'International Tables Vol C Tables 4.2.6.8 and 6.1.1.4'
 'I'  'I'  -0.4742   1.8119
 'International Tables Vol C Tables 4.2.6.8 and 6.1.1.4'
 
_symmetry_cell_setting            orthorhombic
_symmetry_space_group_name_H-M    Ccca
_symmetry_space_group_name_Hall   '-C 2b 2bc'
 
loop_
 _symmetry_equiv_pos_as_xyz
 'x, y, z'
 '-x+1/2, -y, z'
 'x, -y+1/2, -z+1/2'
 '-x, y, -z+1/2'
 'x+1/2, y+1/2, z'
 '-x+1, -y+1/2, z'
 'x+1/2, -y+1, -z+1/2'
 '-x+1/2, y+1/2, -z+1/2'
 '-x, -y, -z'
 'x-1/2, y, -z'
 '-x, y-1/2, z-1/2'
 'x, -y, z-1/2'
 '-x+1/2, -y+1/2, -z'
 'x, y+1/2, -z'
 '-x+1/2, y, z-1/2'
 'x+1/2, -y+1/2, z-1/2'
 
_cell_length_a                    7.7529(2)
_cell_length_b                    20.1808(6)
_cell_length_c                    27.1449(8)
_cell_angle_alpha                 90.00
_cell_angle_beta                  90.00
_cell_angle_gamma                 90.00
_cell_volume                      4247.1(2)
_cell_formula_units_Z             16
_cell_measurement_temperature     293(2)
_cell_measurement_reflns_used     7003
_cell_measurement_theta_min       3.605  
_cell_measurement_theta_max       27.4975
 
_exptl_crystal_description        plate
_exptl_crystal_colour             colourless
_exptl_crystal_size_max           0.37
_exptl_crystal_size_mid           0.34
_exptl_crystal_size_min           0.02
_exptl_crystal_density_meas       ?
_exptl_crystal_density_diffrn     1.902
_exptl_crystal_density_method     'not measured'
_exptl_crystal_F_000              2336
_exptl_absorpt_coefficient_mu     2.992
_exptl_absorpt_correction_type                              multi-scan
_exptl_absorpt_process_details
;
  [Sheldrick, G.M. (2002). SADABS Bruker AXS Inc., Madison, Wisconsin, USA]
;
_exptl_absorpt_correction_T_min                      0.344
_exptl_absorpt_correction_T_max                      0.942

#----------------------------- Remark ------------------------------------#
# SADABS output:                                                          #
# Estimated minimum and maximum transmission:  0.4902  0.7456             #
# The ratio of these values is more reliable than their absolute values!  #
#-------------------------------------------------------------------------#
 
_exptl_special_details
;
 ?
;
 
_diffrn_ambient_temperature       293(2)
_diffrn_radiation_wavelength      0.71073
_diffrn_radiation_type            MoK\a
_diffrn_radiation_source          'fine-focus sealed tube'
_diffrn_measurement_device_type   'KappaCCD'
_diffrn_measurement_device        '95mm CCD camera on \k-goniostat'
_diffrn_detector_area_resol_mean  9
_diffrn_radiation_monochromator   'horizonally mounted graphite crystal'
_diffrn_measurement_method        'CCD'
_diffrn_standards_number          ?
_diffrn_standards_interval_count  ?
_diffrn_standards_interval_time   ?
_diffrn_standards_decay_%         ?
_diffrn_reflns_number             26379
_diffrn_reflns_av_R_equivalents   0.0875
_diffrn_reflns_av_sigmaI/netI     0.0506
_diffrn_reflns_limit_h_min        -10
_diffrn_reflns_limit_h_max        10
_diffrn_reflns_limit_k_min        -25
_diffrn_reflns_limit_k_max        26
_diffrn_reflns_limit_l_min        -35
_diffrn_reflns_limit_l_max        35
_diffrn_reflns_theta_min          3.60
_diffrn_reflns_theta_max          27.50
_reflns_number_total              2436
_reflns_number_gt                 1321
_reflns_threshold_expression      >2sigma(I)
 
_computing_data_collection        'Collect (Bruker AXS BV, 1997-2004)'
_computing_cell_refinement        'Dirax/lsq (Duisenberg & Schreurs, 1989-2000)'
_computing_data_reduction         'EvalCCD (Duisenberg & Schreurs 1990-2000)'
_computing_structure_solution     'SIR92 (Altomare et al., 1993)'
_computing_structure_refinement   'SHELXL-97 (Sheldrick, 1997)'
_computing_molecular_graphics     'Ortep-3 for Windows (Farrugia, 1997)'
_computing_publication_material   'WinGX publication routines (Farrugia, 1999)'
 
_refine_special_details
;
 Refinement of F^2^ against ALL reflections.  The weighted R-factor wR and
 goodness of fit S are based on F^2^, conventional R-factors R are based
 on F, with F set to zero for negative F^2^. The threshold expression of
 F^2^ > 2sigma(F^2^) is used only for calculating R-factors(gt) etc. and is
 not relevant to the choice of reflections for refinement.  R-factors based
 on F^2^ are statistically about twice as large as those based on F, and R-
 factors based on ALL data will be even larger.
;
 
_refine_ls_structure_factor_coef  Fsqd
_refine_ls_matrix_type            full
_refine_ls_weighting_scheme       calc
_refine_ls_weighting_details
 'calc w=1/[\s^2^(Fo^2^)+(0.0712P)^2^+1.8608P] where P=(Fo^2^+2Fc^2^)/3'
_atom_sites_solution_primary      direct
_atom_sites_solution_secondary    difmap
_atom_sites_solution_hydrogens    geom
_refine_ls_hydrogen_treatment     constr
_refine_ls_extinction_method      none
_refine_ls_extinction_coef        ?
_refine_ls_number_reflns          2436
_refine_ls_number_parameters      132
_refine_ls_number_restraints      0
_refine_ls_R_factor_all           0.1161
_refine_ls_R_factor_gt            0.0489
_refine_ls_wR_factor_ref          0.1358
_refine_ls_wR_factor_gt           0.1074
_refine_ls_goodness_of_fit_ref    1.026
_refine_ls_restrained_S_all       1.026
_refine_ls_shift/su_max           0.000
_refine_ls_shift/su_mean          0.000
 
loop_
 _atom_site_label
 _atom_site_type_symbol
 _atom_site_fract_x
 _atom_site_fract_y
 _atom_site_fract_z
 _atom_site_U_iso_or_equiv
 _atom_site_adp_type
 _atom_site_occupancy
 _atom_site_symmetry_multiplicity
 _atom_site_calc_flag
 _atom_site_refinement_flags
 _atom_site_disorder_assembly
 _atom_site_disorder_group
I1 I 0.5000 0.2500 0.02344(2) 0.0505(2) Uani 1 2 d S . .
N1 N 0.5000 0.2500 0.1014(2) 0.0455(19) Uani 1 2 d S . .
O1 O 0.5823(8) 0.1421(3) 0.1122(2) 0.0895(18) Uani 1 1 d . . .
C1 C 0.5403(10) 0.1951(4) 0.1289(3) 0.0558(19) Uani 1 1 d . . .
C2 C 0.5258(10) 0.2130(3) 0.1827(2) 0.064(2) Uani 1 1 d . . .
H2A H 0.6350 0.2065 0.1994 0.077 Uiso 1 1 calc R . .
H2B H 0.4384 0.1863 0.1988 0.077 Uiso 1 1 calc R . .
I2 I 0.2500 0.0000 0.14411(2) 0.0584(3) Uani 1 2 d S . .
O2 O 0.2239(8) 0.1120(3) 0.23488(19) 0.0857(17) Uani 1 1 d . . .
N2 N 0.2500 0.0000 0.2231(3) 0.055(2) Uani 1 2 d S . .
C3 C 0.2369(9) 0.0569(4) 0.2513(2) 0.0554(18) Uani 1 1 d . . .
C4 C 0.2423(9) 0.0371(4) 0.3047(2) 0.0591(18) Uani 1 1 d . . .
H4A H 0.3407 0.0571 0.3211 0.071 Uiso 1 1 calc R . .
H4B H 0.1379 0.0509 0.3215 0.071 Uiso 1 1 calc R . .
N3 N 0.5000 0.2500 -0.0684(3) 0.0385(16) Uani 1 2 d S . .
C5 C 0.4414(10) 0.3017(4) -0.0933(3) 0.063(2) Uani 1 1 d . . .
H5 H 0.4012 0.3385 -0.0762 0.076 Uiso 1 1 calc R . .
C6 C 0.4387(13) 0.3024(5) -0.1438(3) 0.089(3) Uani 1 1 d . . .
H6 H 0.3946 0.3388 -0.1606 0.107 Uiso 1 1 calc R . .
C7 C 0.5000 0.2500 -0.1689(5) 0.094(5) Uani 1 2 d S . .
H7 H 0.5000 0.2500 -0.2031 0.113 Uiso 1 2 calc SR . .
N4 N 0.2500 0.0000 0.0546(3) 0.0474(18) Uani 1 2 d S . .
C8 C 0.3099(10) 0.0521(4) 0.0294(3) 0.064(2) Uani 1 1 d . . .
H8 H 0.3558 0.0879 0.0466 0.077 Uiso 1 1 calc R . .
C9 C 0.3055(11) 0.0543(5) -0.0211(3) 0.083(3) Uani 1 1 d . . .
H9 H 0.3398 0.0921 -0.0380 0.100 Uiso 1 1 calc R . .
C10 C 0.2500 0.0000 -0.0458(3) 0.081(4) Uani 1 2 d S . .
H10 H 0.2500 0.0000 -0.0801 0.097 Uiso 1 2 calc SR . .
 
loop_
 _atom_site_aniso_label
 _atom_site_aniso_U_11
 _atom_site_aniso_U_22
 _atom_site_aniso_U_33
 _atom_site_aniso_U_23
 _atom_site_aniso_U_13
 _atom_site_aniso_U_12
I1 0.0529(4) 0.0621(4) 0.0364(3) 0.000 0.000 -0.0035(3)
N1 0.062(5) 0.052(5) 0.023(4) 0.000 0.000 0.001(4)
O1 0.158(6) 0.054(3) 0.056(3) -0.005(3) -0.010(4) 0.020(4)
C1 0.082(5) 0.047(4) 0.038(4) 0.005(3) -0.004(4) 0.000(4)
C2 0.090(6) 0.067(5) 0.034(3) 0.008(3) -0.003(4) -0.015(4)
I2 0.0642(4) 0.0727(5) 0.0384(4) 0.000 0.000 -0.0038(4)
O2 0.138(5) 0.059(4) 0.061(3) 0.016(3) -0.017(3) -0.001(3)
N2 0.068(5) 0.056(5) 0.040(4) 0.000 0.000 0.003(5)
C3 0.066(5) 0.061(5) 0.038(3) 0.003(3) -0.001(4) -0.009(4)
C4 0.068(5) 0.069(4) 0.041(3) -0.010(3) 0.000(4) -0.015(5)
N3 0.033(3) 0.052(4) 0.030(3) 0.000 0.000 -0.004(4)
C5 0.075(5) 0.049(4) 0.065(5) 0.000(4) -0.014(4) 0.011(4)
C6 0.105(8) 0.094(7) 0.070(6) 0.039(5) -0.019(5) -0.013(6)
C7 0.091(10) 0.152(15) 0.040(6) 0.000 0.000 -0.003(10)
N4 0.052(4) 0.047(5) 0.042(4) 0.000 0.000 0.003(4)
C8 0.075(5) 0.057(5) 0.061(5) -0.009(4) 0.004(4) -0.003(4)
C9 0.093(7) 0.092(7) 0.065(6) 0.021(5) 0.004(4) -0.010(5)
C10 0.114(10) 0.103(10) 0.025(5) 0.000 0.000 -0.010(9)
 
_geom_special_details
;
 All esds (except the esd in the dihedral angle between two l.s. planes)
 are estimated using the full covariance matrix.  The cell esds are taken
 into account individually in the estimation of esds in distances, angles
 and torsion angles; correlations between esds in cell parameters are only
 used when they are defined by crystal symmetry.  An approximate (isotropic)
 treatment of cell esds is used for estimating esds involving l.s. planes.
;
 
loop_
 _geom_bond_atom_site_label_1
 _geom_bond_atom_site_label_2
 _geom_bond_distance
 _geom_bond_site_symmetry_2
 _geom_bond_publ_flag
I1 N1 2.117(6) . ?
I1 N3 2.493(7) . ?
N1 C1 1.371(7) 6 ?
N1 C1 1.371(7) . ?
O1 C1 1.207(8) . ?
C1 C2 1.509(9) . ?
C2 C2 1.547(14) 6 ?
C2 H2A 0.9700 . ?
C2 H2B 0.9700 . ?
I2 N2 2.144(7) . ?
I2 N4 2.429(7) . ?
O2 C3 1.202(9) . ?
N2 C3 1.384(8) 2 ?
N2 C3 1.384(8) . ?
C3 C4 1.505(9) . ?
C4 C4 1.502(15) 2 ?
C4 H4A 0.9700 . ?
C4 H4B 0.9700 . ?
N3 C5 1.325(8) . ?
N3 C5 1.325(8) 6 ?
C5 C6 1.370(11) . ?
C5 H5 0.9300 . ?
C6 C7 1.344(13) . ?
C6 H6 0.9300 . ?
C7 C6 1.344(13) 6 ?
C7 H7 0.9300 . ?
N4 C8 1.338(9) . ?
N4 C8 1.338(9) 2 ?
C8 C9 1.372(10) . ?
C8 H8 0.9300 . ?
C9 C10 1.354(11) . ?
C9 H9 0.9300 . ?
C10 C9 1.354(11) 2 ?
C10 H10 0.9300 . ?
 
loop_
 _geom_angle_atom_site_label_1
 _geom_angle_atom_site_label_2
 _geom_angle_atom_site_label_3
 _geom_angle
 _geom_angle_site_symmetry_1
 _geom_angle_site_symmetry_3
 _geom_angle_publ_flag
N1 I1 N3 180.0 . . ?
C1 N1 C1 114.2(8) 6 . ?
C1 N1 I1 122.9(4) 6 . ?
C1 N1 I1 122.9(4) . . ?
O1 C1 N1 125.0(6) . . ?
O1 C1 C2 126.6(7) . . ?
N1 C1 C2 108.4(6) . . ?
C1 C2 C2 104.5(4) . 6 ?
C1 C2 H2A 110.9 . . ?
C2 C2 H2A 110.9 6 . ?
C1 C2 H2B 110.9 . . ?
C2 C2 H2B 110.9 6 . ?
H2A C2 H2B 108.9 . . ?
N2 I2 N4 180.0 . . ?
C3 N2 C3 112.8(8) 2 . ?
C3 N2 I2 123.6(4) 2 . ?
C3 N2 I2 123.6(4) . . ?
O2 C3 N2 124.6(6) . . ?
O2 C3 C4 127.3(7) . . ?
N2 C3 C4 108.1(6) . . ?
C4 C4 C3 105.5(4) 2 . ?
C4 C4 H4A 110.6 2 . ?
C3 C4 H4A 110.6 . . ?
C4 C4 H4B 110.6 2 . ?
C3 C4 H4B 110.6 . . ?
H4A C4 H4B 108.8 . . ?
C5 N3 C5 118.5(9) . 6 ?
C5 N3 I1 120.8(4) . . ?
C5 N3 I1 120.8(4) 6 . ?
N3 C5 C6 121.6(8) . . ?
N3 C5 H5 119.2 . . ?
C6 C5 H5 119.2 . . ?
C7 C6 C5 119.5(10) . . ?
C7 C6 H6 120.2 . . ?
C5 C6 H6 120.2 . . ?
C6 C7 C6 119.2(12) 6 . ?
C6 C7 H7 120.4 6 . ?
C6 C7 H7 120.4 . . ?
C8 N4 C8 118.4(9) . 2 ?
C8 N4 I2 120.8(4) . . ?
C8 N4 I2 120.8(4) 2 . ?
N4 C8 C9 121.8(8) . . ?
N4 C8 H8 119.1 . . ?
C9 C8 H8 119.1 . . ?
C10 C9 C8 118.5(9) . . ?
C10 C9 H9 120.7 . . ?
C8 C9 H9 120.7 . . ?
C9 C10 C9 120.6(10) 2 . ?
C9 C10 H10 119.7 2 . ?
C9 C10 H10 119.7 . . ?
 
loop_
 _geom_torsion_atom_site_label_1
 _geom_torsion_atom_site_label_2
 _geom_torsion_atom_site_label_3
 _geom_torsion_atom_site_label_4
 _geom_torsion
 _geom_torsion_site_symmetry_1
 _geom_torsion_site_symmetry_2
 _geom_torsion_site_symmetry_3
 _geom_torsion_site_symmetry_4
 _geom_torsion_publ_flag
N3 I1 N1 C1 -51(100) . . . 6 ?
N3 I1 N1 C1 129(100) . . . . ?
C1 N1 C1 O1 -178.7(10) 6 . . . ?
I1 N1 C1 O1 1.3(10) . . . . ?
C1 N1 C1 C2 0.4(4) 6 . . . ?
I1 N1 C1 C2 -179.6(4) . . . . ?
O1 C1 C2 C2 178.1(9) . . . 6 ?
N1 C1 C2 C2 -1.0(9) . . . 6 ?
N4 I2 N2 C3 -85(49) . . . 2 ?
N4 I2 N2 C3 95(52) . . . . ?
C3 N2 C3 O2 -179.9(9) 2 . . . ?
I2 N2 C3 O2 0.1(9) . . . . ?
C3 N2 C3 C4 0.3(4) 2 . . . ?
I2 N2 C3 C4 -179.7(4) . . . . ?
O2 C3 C4 C4 179.5(7) . . . 2 ?
N2 C3 C4 C4 -0.7(10) . . . 2 ?
N1 I1 N3 C5 43(100) . . . . ?
N1 I1 N3 C5 -137(100) . . . 6 ?
C5 N3 C5 C6 0.7(6) 6 . . . ?
I1 N3 C5 C6 -179.3(6) . . . . ?
N3 C5 C6 C7 -1.4(13) . . . . ?
C5 C6 C7 C6 0.7(6) . . . 6 ?
N2 I2 N4 C8 -66(49) . . . . ?
N2 I2 N4 C8 114(47) . . . 2 ?
C8 N4 C8 C9 2.4(6) 2 . . . ?
I2 N4 C8 C9 -177.6(6) . . . . ?
N4 C8 C9 C10 -4.7(12) . . . . ?
C8 C9 C10 C9 2.3(6) . . . 2 ?
 
_diffrn_measured_fraction_theta_max    0.998
_diffrn_reflns_theta_full              27.50
_diffrn_measured_fraction_theta_full   0.998
_refine_diff_density_max    2.664
_refine_diff_density_min   -0.772
_refine_diff_density_rms    0.145

#===END

 
data_NIS-Pic
 
_audit_creation_method            SHELXL-97
_chemical_name_systematic
;
 ?
;
_chemical_name_common      'N-iodo-succinimide/4-picoline'
_chemical_melting_point           ?
_chemical_formula_moiety         
'C10 H11 I N2 O2, C4 H4 I N O2, C6 H7 N'
_chemical_formula_sum
 'C10 H11 I N2 O2'
_chemical_formula_weight          318.11
 
loop_
 _atom_type_symbol
 _atom_type_description
 _atom_type_scat_dispersion_real
 _atom_type_scat_dispersion_imag
 _atom_type_scat_source
 'C'  'C'   0.0033   0.0016
 'International Tables Vol C Tables 4.2.6.8 and 6.1.1.4'
 'H'  'H'   0.0000   0.0000
 'International Tables Vol C Tables 4.2.6.8 and 6.1.1.4'
 'N'  'N'   0.0061   0.0033
 'International Tables Vol C Tables 4.2.6.8 and 6.1.1.4'
 'O'  'O'   0.0106   0.0060
 'International Tables Vol C Tables 4.2.6.8 and 6.1.1.4'
 'I'  'I'  -0.4742   1.8119
 'International Tables Vol C Tables 4.2.6.8 and 6.1.1.4'
 
_symmetry_cell_setting            'monoclinic'
_symmetry_space_group_name_H-M    'P2/a'
_symmetry_space_group_name_Hall    '-P 2ya'
 
loop_
 _symmetry_equiv_pos_as_xyz
 'x, y, z'
 '-x+1/2, y, -z'
 '-x, -y, -z'
 'x-1/2, -y, z'
 
_cell_length_a                    7.7617(4)
_cell_length_b                    14.5317(8)
_cell_length_c                    10.6247(6)
_cell_angle_alpha                 90.00
_cell_angle_beta                  108.296(3)
_cell_angle_gamma                 90.00
_cell_volume                      1137.79(11)
_cell_formula_units_Z             4
_cell_measurement_temperature     293(2)
_cell_measurement_reflns_used     2688
_cell_measurement_theta_min       2.910
_cell_measurement_theta_max       27.485
 
_exptl_crystal_description        prism
_exptl_crystal_colour             colorless
_exptl_crystal_size_max           0.24
_exptl_crystal_size_mid           0.08
_exptl_crystal_size_min           0.03

_exptl_crystal_density_meas       ?
_exptl_crystal_density_diffrn     1.857
_exptl_crystal_density_method     'not measured'
_exptl_crystal_F_000              616
_exptl_absorpt_coefficient_mu     2.797
_exptl_absorpt_correction_type                          multi-scan
_exptl_absorpt_process_details
;
  [Sheldrick, G.M. (2002). SADABS Bruker AXS Inc., Madison, Wisconsin, USA]
;
_exptl_absorpt_correction_T_min            0.765
       
_exptl_absorpt_correction_T_max             0.920

#----------------------------- Remark ------------------------------#
# SADABS output:                                                    #
# Estimated minimum and maximum transmission: 0.5599  0.7456  #
# The ratio of these values is more reliable than their absolute values!  #
#-------------------------------------------------------------------#
 
_exptl_special_details 
; 
 ? 
; 
 
_diffrn_ambient_temperature       293(2)
_diffrn_radiation_wavelength      0.71073
_diffrn_radiation_type            MoK\a
_diffrn_radiation_source          'fine-focus sealed tube'
_diffrn_measurement_device_type   'KappaCCD'
_diffrn_measurement_device        '95mm CCD camera on \k-goniostat'
_diffrn_detector_area_resol_mean  9
_diffrn_radiation_monochromator   'horizonally mounted graphite crystal'
_diffrn_measurement_method        'CCD'
_diffrn_standards_number          ?
_diffrn_standards_interval_count  ?
_diffrn_standards_interval_time   ?
_diffrn_standards_decay_%         ?
_diffrn_reflns_number             18036
_diffrn_reflns_av_R_equivalents   0.0712
_diffrn_reflns_av_sigmaI/netI     0.0426
_diffrn_reflns_limit_h_min        -9
_diffrn_reflns_limit_h_max        10
_diffrn_reflns_limit_k_min        -17
_diffrn_reflns_limit_k_max        18
_diffrn_reflns_limit_l_min        -13
_diffrn_reflns_limit_l_max        13
_diffrn_reflns_theta_min          3.94
_diffrn_reflns_theta_max          27.50
_reflns_number_total              2619
_reflns_number_gt                 1777
_reflns_threshold_expression      >2sigma(I)
 
_computing_cell_refinement        'Dirax/lsq (Duisenberg & Schreurs, 1989-2000)'
_computing_data_reduction         'EvalCCD (Duisenberg & Schreurs 1990-2000)'
_computing_structure_solution     'SIR92 (Altomare et al., 1993)'
_computing_structure_refinement   'SHELXL-97 (Sheldrick, 1997)'
_computing_molecular_graphics     'Ortep-3 for Windows (Farrugia, 1997)'
_computing_publication_material   'WinGX publication routines (Farrugia, 1999)'

 
_refine_special_details
;
 Refinement of F^2^ against ALL reflections.  The weighted R-factor wR and
 goodness of fit S are based on F^2^, conventional R-factors R are based
 on F, with F set to zero for negative F^2^. The threshold expression of
 F^2^ > 2sigma(F^2^) is used only for calculating R-factors(gt) etc. and is
 not relevant to the choice of reflections for refinement.  R-factors based
 on F^2^ are statistically about twice as large as those based on F, and R-
 factors based on ALL data will be even larger.
;
 
_refine_ls_structure_factor_coef  Fsqd
_refine_ls_matrix_type            full
_refine_ls_weighting_scheme       calc
_refine_ls_weighting_details
 'calc w=1/[\s^2^(Fo^2^)+(0.0182P)^2^+0.9371P] where P=(Fo^2^+2Fc^2^)/3'
_atom_sites_solution_primary      direct
_atom_sites_solution_secondary    difmap
_atom_sites_solution_hydrogens    geom
_refine_ls_hydrogen_treatment     constr
_refine_ls_extinction_method      none
_refine_ls_extinction_coef        ?
_refine_ls_number_reflns          2619
_refine_ls_number_parameters      141
_refine_ls_number_restraints      0
_refine_ls_R_factor_all           0.0673
_refine_ls_R_factor_gt            0.0340
_refine_ls_wR_factor_ref          0.0634
_refine_ls_wR_factor_gt           0.0557
_refine_ls_goodness_of_fit_ref    1.056
_refine_ls_restrained_S_all       1.056
_refine_ls_shift/su_max           0.002
_refine_ls_shift/su_mean          0.000
 
loop_
 _atom_site_label
 _atom_site_type_symbol
 _atom_site_fract_x
 _atom_site_fract_y
 _atom_site_fract_z
 _atom_site_U_iso_or_equiv
 _atom_site_adp_type
 _atom_site_occupancy
 _atom_site_symmetry_multiplicity
 _atom_site_calc_flag
 _atom_site_refinement_flags
 _atom_site_disorder_assembly
 _atom_site_disorder_group
C1 C 0.3560(6) 1.1708(3) 0.6020(5) 0.0485(11) Uani 1 1 d . . .
H1 H 0.4315 1.1387 0.6739 0.058 Uiso 1 1 calc R . .
C2 C 0.3586(6) 1.2655(3) 0.6053(5) 0.0495(11) Uani 1 1 d . . .
H2 H 0.4342 1.2958 0.6792 0.059 Uiso 1 1 calc R . .
C3 C 0.2500 1.3162(4) 0.5000 0.0424(16) Uani 1 2 d S . .
C4 C 0.2500 1.4191(4) 0.5000 0.0602(19) Uani 1 2 d S . .
H4A H 0.3341 1.4411 0.5814 0.090 Uiso 0.50 1 calc PR . .
H4B H 0.1304 1.4411 0.4920 0.090 Uiso 0.50 1 calc PR . .
H4C H 0.2855 1.4411 0.4266 0.090 Uiso 0.50 1 calc PR . .
C5 C 0.1534(6) 0.7545(3) 0.3945(5) 0.0471(11) Uani 1 1 d . . .
C6 C 0.1920(6) 0.6553(3) 0.4274(5) 0.0552(13) Uani 1 1 d . . .
H6A H 0.2572 0.6281 0.3723 0.066 Uiso 1 1 calc R . .
H6B H 0.0804 0.6213 0.4151 0.066 Uiso 1 1 calc R . .
C7 C 0.8237(6) 0.4948(3) 0.1129(5) 0.0488(11) Uani 1 1 d . . .
C8 C 0.7908(7) 0.5945(3) 0.0741(5) 0.0562(13) Uani 1 1 d . . .
H8A H 0.7081 0.6220 0.1154 0.067 Uiso 1 1 calc R . .
H8B H 0.9038 0.6287 0.1010 0.067 Uiso 1 1 calc R . .
C9 C 0.7500 -0.1671(4) 0.0000 0.062(2) Uani 1 2 d S . .
H9A H 0.7564 -0.1892 -0.0836 0.093 Uiso 0.50 1 calc PR . .
H9B H 0.6406 -0.1892 0.0136 0.093 Uiso 0.50 1 calc PR . .
H9C H 0.8530 -0.1892 0.0700 0.093 Uiso 0.50 1 calc PR . .
C10 C 0.7500 -0.0648(4) 0.0000 0.0440(17) Uani 1 2 d S . .
C11 C 0.7579(6) -0.0138(3) -0.1077(4) 0.0499(10) Uani 1 1 d . . .
H11 H 0.7626 -0.0442 -0.1836 0.060 Uiso 1 1 calc R . .
C12 C 0.7590(6) 0.0800(3) -0.1056(5) 0.0508(11) Uani 1 1 d . . .
H12 H 0.7661 0.1119 -0.1797 0.061 Uiso 1 1 calc R . .
N4 N 0.7500 0.1276(3) 0.0000 0.0431(13) Uani 1 2 d S . .
N1 N 0.2500 1.1236(3) 0.5000 0.0475(14) Uani 1 2 d S . .
N2 N 0.2500 0.8071(3) 0.5000 0.0408(13) Uani 1 2 d S . .
N3 N 0.7500 0.4421(3) 0.0000 0.0452(14) Uani 1 2 d S . .
O1 O 0.0558(5) 0.7853(2) 0.2904(3) 0.0758(10) Uani 1 1 d . . .
O2 O 0.8988(5) 0.4639(2) 0.2221(4) 0.0757(10) Uani 1 1 d . . .
I01 I 0.2500 0.95272(2) 0.5000 0.04166(13) Uani 1 2 d S . .
I02 I 0.7500 0.29468(3) 0.0000 0.04588(13) Uani 1 2 d S . .
 
loop_
 _atom_site_aniso_label
 _atom_site_aniso_U_11
 _atom_site_aniso_U_22
 _atom_site_aniso_U_33
 _atom_site_aniso_U_23
 _atom_site_aniso_U_13
 _atom_site_aniso_U_12
C1 0.051(2) 0.037(2) 0.056(3) 0.008(2) 0.015(2) 0.0024(19)
C2 0.053(3) 0.040(2) 0.052(3) -0.005(2) 0.010(2) -0.006(2)
C3 0.050(4) 0.031(3) 0.046(5) 0.000 0.014(3) 0.000
C4 0.060(4) 0.036(4) 0.080(5) 0.000 0.016(4) 0.000
C5 0.056(3) 0.039(2) 0.046(3) 0.002(2) 0.017(2) -0.004(2)
C6 0.072(3) 0.035(2) 0.066(3) -0.006(2) 0.032(3) -0.008(2)
C7 0.058(3) 0.039(2) 0.048(3) -0.005(2) 0.014(2) -0.008(2)
C8 0.067(3) 0.031(2) 0.070(4) -0.008(2) 0.022(3) -0.003(2)
C9 0.063(4) 0.031(3) 0.078(5) 0.000 0.004(4) 0.000
C10 0.036(3) 0.034(3) 0.057(5) 0.000 0.007(3) 0.000
C11 0.065(3) 0.041(2) 0.043(3) -0.0042(19) 0.016(2) 0.005(2)
C12 0.066(3) 0.039(2) 0.049(3) 0.009(2) 0.021(2) 0.004(2)
N4 0.047(3) 0.030(3) 0.046(4) 0.000 0.006(3) 0.000
N1 0.051(3) 0.028(3) 0.069(4) 0.000 0.026(3) 0.000
N2 0.047(3) 0.030(3) 0.046(4) 0.000 0.016(3) 0.000
N3 0.051(3) 0.031(3) 0.050(4) 0.000 0.011(3) 0.000
O1 0.096(3) 0.060(2) 0.056(2) 0.0067(17) 0.000(2) -0.0163(19)
O2 0.107(3) 0.0511(19) 0.052(2) 0.0068(17) -0.001(2) -0.0060(19)
I01 0.0433(2) 0.0304(2) 0.0556(3) 0.000 0.0218(2) 0.000
I02 0.0483(2) 0.0296(2) 0.0579(3) 0.000 0.0140(2) 0.000
 
_geom_special_details
;
 All esds (except the esd in the dihedral angle between two l.s. planes)
 are estimated using the full covariance matrix.  The cell esds are taken
 into account individually in the estimation of esds in distances, angles
 and torsion angles; correlations between esds in cell parameters are only
 used when they are defined by crystal symmetry.  An approximate (isotropic)
 treatment of cell esds is used for estimating esds involving l.s. planes.
;
 
loop_
 _geom_bond_atom_site_label_1
 _geom_bond_atom_site_label_2
 _geom_bond_distance
 _geom_bond_site_symmetry_2
 _geom_bond_publ_flag
C1 N1 1.327(5) . ?
C1 C2 1.377(6) . ?
C1 H1 0.9300 . ?
C2 C3 1.383(5) . ?
C2 H2 0.9300 . ?
C3 C2 1.383(5) 2_556 ?
C3 C4 1.495(8) . ?
C4 H4A 0.9600 . ?
C4 H4B 0.9600 . ?
C4 H4C 0.9600 . ?
C5 O1 1.213(5) . ?
C5 N2 1.369(5) . ?
C5 C6 1.492(6) . ?
C6 C6 1.522(10) 2_556 ?
C6 H6A 0.9700 . ?
C6 H6B 0.9700 . ?
C7 O2 1.209(5) . ?
C7 N3 1.387(5) . ?
C7 C8 1.506(6) . ?
C8 C8 1.502(10) 2_655 ?
C8 H8A 0.9700 . ?
C8 H8B 0.9700 . ?
C9 C10 1.488(8) . ?
C9 H9A 0.9600 . ?
C9 H9B 0.9600 . ?
C9 H9C 0.9600 . ?
C10 C11 1.381(5) . ?
C10 C11 1.381(5) 2_655 ?
C11 C12 1.363(6) . ?
C11 H11 0.9300 . ?
C12 N4 1.338(5) . ?
C12 H12 0.9300 . ?
N4 C12 1.338(5) 2_655 ?
N4 I02 2.428(5) . ?
N1 C1 1.327(5) 2_556 ?
N1 I01 2.484(5) . ?
N2 C5 1.369(5) 2_556 ?
N2 I01 2.116(5) . ?
N3 C7 1.387(5) 2_655 ?
N3 I02 2.142(5) . ?
 
loop_
 _geom_angle_atom_site_label_1
 _geom_angle_atom_site_label_2
 _geom_angle_atom_site_label_3
 _geom_angle
 _geom_angle_site_symmetry_1
 _geom_angle_site_symmetry_3
 _geom_angle_publ_flag
N1 C1 C2 122.5(4) . . ?
N1 C1 H1 118.7 . . ?
C2 C1 H1 118.7 . . ?
C1 C2 C3 120.8(5) . . ?
C1 C2 H2 119.6 . . ?
C3 C2 H2 119.6 . . ?
C2 C3 C2 115.7(6) 2_556 . ?
C2 C3 C4 122.2(3) 2_556 . ?
C2 C3 C4 122.2(3) . . ?
C3 C4 H4A 109.5 . . ?
C3 C4 H4B 109.5 . . ?
H4A C4 H4B 109.5 . . ?
C3 C4 H4C 109.5 . . ?
H4A C4 H4C 109.5 . . ?
H4B C4 H4C 109.5 . . ?
O1 C5 N2 124.4(4) . . ?
O1 C5 C6 126.3(4) . . ?
N2 C5 C6 109.2(4) . . ?
C5 C6 C6 104.4(3) . 2_556 ?
C5 C6 H6A 110.9 . . ?
C6 C6 H6A 110.9 2_556 . ?
C5 C6 H6B 110.9 . . ?
C6 C6 H6B 110.9 2_556 . ?
H6A C6 H6B 108.9 . . ?
O2 C7 N3 124.7(4) . . ?
O2 C7 C8 127.5(4) . . ?
N3 C7 C8 107.8(4) . . ?
C8 C8 C7 105.4(3) 2_655 . ?
C8 C8 H8A 110.7 2_655 . ?
C7 C8 H8A 110.7 . . ?
C8 C8 H8B 110.7 2_655 . ?
C7 C8 H8B 110.7 . . ?
H8A C8 H8B 108.8 . . ?
C10 C9 H9A 109.5 . . ?
C10 C9 H9B 109.5 . . ?
H9A C9 H9B 109.5 . . ?
C10 C9 H9C 109.5 . . ?
H9A C9 H9C 109.5 . . ?
H9B C9 H9C 109.5 . . ?
C11 C10 C11 115.0(6) . 2_655 ?
C11 C10 C9 122.5(3) . . ?
C11 C10 C9 122.5(3) 2_655 . ?
C12 C11 C10 121.7(4) . . ?
C12 C11 H11 119.2 . . ?
C10 C11 H11 119.2 . . ?
N4 C12 C11 121.9(4) . . ?
N4 C12 H12 119.1 . . ?
C11 C12 H12 119.1 . . ?
C12 N4 C12 117.8(5) . 2_655 ?
C12 N4 I02 121.1(3) . . ?
C12 N4 I02 121.1(3) 2_655 . ?
C1 N1 C1 117.8(5) . 2_556 ?
C1 N1 I01 121.1(3) . . ?
C1 N1 I01 121.1(3) 2_556 . ?
C5 N2 C5 112.2(5) . 2_556 ?
C5 N2 I01 123.9(2) . . ?
C5 N2 I01 123.9(2) 2_556 . ?
C7 N3 C7 112.9(5) . 2_655 ?
C7 N3 I02 123.5(3) . . ?
C7 N3 I02 123.5(3) 2_655 . ?
N2 I01 N1 180.000(1) . . ?
N3 I02 N4 180.0 . . ?
 
loop_
 _geom_torsion_atom_site_label_1
 _geom_torsion_atom_site_label_2
 _geom_torsion_atom_site_label_3
 _geom_torsion_atom_site_label_4
 _geom_torsion
 _geom_torsion_site_symmetry_1
 _geom_torsion_site_symmetry_2
 _geom_torsion_site_symmetry_3
 _geom_torsion_site_symmetry_4
 _geom_torsion_publ_flag
N1 C1 C2 C3 -0.6(7) . . . . ?
C1 C2 C3 C2 0.3(3) . . . 2_556 ?
C1 C2 C3 C4 -179.7(3) . . . . ?
O1 C5 C6 C6 -175.4(5) . . . 2_556 ?
N2 C5 C6 C6 6.2(6) . . . 2_556 ?
O2 C7 C8 C8 174.7(5) . . . 2_655 ?
N3 C7 C8 C8 -5.9(6) . . . 2_655 ?
C11 C10 C11 C12 0.4(3) 2_655 . . . ?
C9 C10 C11 C12 -179.6(3) . . . . ?
C10 C11 C12 N4 -0.9(7) . . . . ?
C11 C12 N4 C12 0.4(3) . . . 2_655 ?
C11 C12 N4 I02 -179.6(3) . . . . ?
C2 C1 N1 C1 0.3(3) . . . 2_556 ?
C2 C1 N1 I01 -179.7(3) . . . . ?
O1 C5 N2 C5 179.1(6) . . . 2_556 ?
C6 C5 N2 C5 -2.5(2) . . . 2_556 ?
O1 C5 N2 I01 -0.9(6) . . . . ?
C6 C5 N2 I01 177.5(2) . . . . ?
O2 C7 N3 C7 -178.3(6) . . . 2_655 ?
C8 C7 N3 C7 2.3(2) . . . 2_655 ?
O2 C7 N3 I02 1.7(6) . . . . ?
C8 C7 N3 I02 -177.7(2) . . . . ?
C5 N2 I01 N1 -111(19) . . . . ?
C5 N2 I01 N1 69(20) 2_556 . . . ?
C1 N1 I01 N2 -65(21) . . . . ?
C1 N1 I01 N2 115(20) 2_556 . . . ?
C7 N3 I02 N4 -80(19) . . . . ?
C7 N3 I02 N4 100(19) 2_655 . . . ?
C12 N4 I02 N3 -68(19) . . . . ?
C12 N4 I02 N3 112(19) 2_655 . . . ?
 
_diffrn_measured_fraction_theta_max    0.997
_diffrn_reflns_theta_full              27.50
_diffrn_measured_fraction_theta_full   0.997
_refine_diff_density_max    0.545
_refine_diff_density_min   -0.579
_refine_diff_density_rms    0.103

#===END

 
data_NIS-DMAP
 
_audit_creation_method            SHELXL-97
_chemical_name_systematic
;
 ?
;
_chemical_name_common    
'N-iodosuccinimide/4-dimethylaminopyridine'  
_chemical_melting_point           ?
_chemical_formula_moiety          
'C4 H4 I N O2, C7 H10 N2'
_chemical_formula_sum
 'C11 H14 I N3 O2'
_chemical_formula_weight          347.15
 
loop_
 _atom_type_symbol
 _atom_type_description
 _atom_type_scat_dispersion_real
 _atom_type_scat_dispersion_imag
 _atom_type_scat_source
 'C'  'C'   0.0033   0.0016
 'International Tables Vol C Tables 4.2.6.8 and 6.1.1.4'
 'H'  'H'   0.0000   0.0000
 'International Tables Vol C Tables 4.2.6.8 and 6.1.1.4'
 'N'  'N'   0.0061   0.0033
 'International Tables Vol C Tables 4.2.6.8 and 6.1.1.4'
 'O'  'O'   0.0106   0.0060
 'International Tables Vol C Tables 4.2.6.8 and 6.1.1.4'
 'I'  'I'  -0.4742   1.8119
 'International Tables Vol C Tables 4.2.6.8 and 6.1.1.4'
 
_symmetry_cell_setting            orthorhombic
_symmetry_space_group_name_H-M    P212121
_symmetry_space_group_name_Hall   'P 2ac 2ab'
 
loop_
 _symmetry_equiv_pos_as_xyz
 'x, y, z'
 '-x+1/2, -y, z+1/2'
 'x+1/2, -y+1/2, -z'
 '-x, y+1/2, -z+1/2'
 
_cell_length_a                    6.4490(12)
_cell_length_b                    7.905(2)
_cell_length_c                    25.9495(13)
_cell_angle_alpha                 90.000
_cell_angle_beta                  90.000
_cell_angle_gamma                 90.000
_cell_volume                      1322.9(4)
_cell_formula_units_Z             4
_cell_measurement_temperature     293(2)
_cell_measurement_reflns_used     5862
_cell_measurement_theta_min       3.528 
_cell_measurement_theta_max       27.4914 
 
_exptl_crystal_description        plate
_exptl_crystal_colour             colourless
_exptl_crystal_size_max           0.42
_exptl_crystal_size_mid           0.18
_exptl_crystal_size_min           0.01
_exptl_crystal_density_meas       ?
_exptl_crystal_density_diffrn     1.743
_exptl_crystal_density_method     'not measured'
_exptl_crystal_F_000              680
_exptl_absorpt_coefficient_mu     2.416
_exptl_absorpt_correction_type                              multi-scan
_exptl_absorpt_process_details
;
  [Sheldrick, G.M. (2002). SADABS Bruker AXS Inc., Madison, Wisconsin, USA]
;
_exptl_absorpt_correction_T_min                      0.599
_exptl_absorpt_correction_T_max                      0.976

#----------------------------- Remark ------------------------------------#
# SADABS output:                                                          #
# Estimated minimum and maximum transmission:  0.5435  0.7456             #
# The ratio of these values is more reliable than their absolute values!  #
#-------------------------------------------------------------------------#
 
_exptl_special_details
;
 ?
;
 
_diffrn_ambient_temperature       293(2)
_diffrn_radiation_wavelength      0.71073
_diffrn_radiation_type            MoK\a
_diffrn_radiation_source          'fine-focus sealed tube'
_diffrn_measurement_device_type   'KappaCCD'
_diffrn_measurement_device        '95mm CCD camera on \k-goniostat'
_diffrn_detector_area_resol_mean  9
_diffrn_radiation_monochromator   'horizonally mounted graphite crystal'
_diffrn_measurement_method        'CCD'
_diffrn_standards_number          ?
_diffrn_standards_interval_count  ?
_diffrn_standards_interval_time   ?
_diffrn_standards_decay_%         ?
_diffrn_reflns_number             15614
_diffrn_reflns_av_R_equivalents   0.0714
_diffrn_reflns_av_sigmaI/netI     0.0632
_diffrn_reflns_limit_h_min        -8
_diffrn_reflns_limit_h_max        8
_diffrn_reflns_limit_k_min        -10
_diffrn_reflns_limit_k_max        10
_diffrn_reflns_limit_l_min        -31
_diffrn_reflns_limit_l_max        33
_diffrn_reflns_theta_min          3.53
_diffrn_reflns_theta_max          27.49
_reflns_number_total              3035
_reflns_number_gt                 2099
_reflns_threshold_expression      >2sigma(I)
 
_computing_data_collection        'Collect (Bruker AXS BV, 1997-2004)'
_computing_cell_refinement        'Dirax/lsq (Duisenberg & Schreurs, 1989-2000)'
_computing_data_reduction         'EvalCCD (Duisenberg & Schreurs 1990-2000)'
_computing_structure_solution     'SIR92 (Altomare et al., 1993)'
_computing_structure_refinement   'SHELXL-97 (Sheldrick, 1997)'
_computing_molecular_graphics     'Ortep-3 for Windows (Farrugia, 1997)'
_computing_publication_material   'WinGX publication routines (Farrugia, 1999)'
 
_refine_special_details
;
 Refinement of F^2^ against ALL reflections.  The weighted R-factor wR and
 goodness of fit S are based on F^2^, conventional R-factors R are based
 on F, with F set to zero for negative F^2^. The threshold expression of
 F^2^ > 2sigma(F^2^) is used only for calculating R-factors(gt) etc. and is
 not relevant to the choice of reflections for refinement.  R-factors based
 on F^2^ are statistically about twice as large as those based on F, and R-
 factors based on ALL data will be even larger.
;
 
_refine_ls_structure_factor_coef  Fsqd
_refine_ls_matrix_type            full
_refine_ls_weighting_scheme       calc
_refine_ls_weighting_details
 'calc w=1/[\s^2^(Fo^2^)+(0.0269P)^2^+0.0000P] where P=(Fo^2^+2Fc^2^)/3'
_atom_sites_solution_primary      direct
_atom_sites_solution_secondary    difmap
_atom_sites_solution_hydrogens    geom
_refine_ls_hydrogen_treatment     constr
_refine_ls_extinction_method      none
_refine_ls_extinction_coef        ?
_refine_ls_abs_structure_details
 'Flack H D (1983), Acta Cryst. A39, 876-881'
_refine_ls_abs_structure_Flack    -0.03(3)
_refine_ls_number_reflns          3035
_refine_ls_number_parameters      154
_refine_ls_number_restraints      0
_refine_ls_R_factor_all           0.0814
_refine_ls_R_factor_gt            0.0406
_refine_ls_wR_factor_ref          0.0718
_refine_ls_wR_factor_gt           0.0625
_refine_ls_goodness_of_fit_ref    1.052
_refine_ls_restrained_S_all       1.052
_refine_ls_shift/su_max           0.002
_refine_ls_shift/su_mean          0.000
 
loop_
 _atom_site_label
 _atom_site_type_symbol
 _atom_site_fract_x
 _atom_site_fract_y
 _atom_site_fract_z
 _atom_site_U_iso_or_equiv
 _atom_site_adp_type
 _atom_site_occupancy
 _atom_site_symmetry_multiplicity
 _atom_site_calc_flag
 _atom_site_refinement_flags
 _atom_site_disorder_assembly
 _atom_site_disorder_group
I001 I 0.58783(5) 0.08998(4) 0.871360(12) 0.05187(12) Uani 1 1 d . . .
O1 O 0.5412(6) -0.1018(6) 0.98561(15) 0.0683(11) Uani 1 1 d . . .
O2 O 1.0531(6) 0.2171(5) 0.91471(15) 0.0685(11) Uani 1 1 d . . .
N1 N 0.7743(6) 0.0548(5) 0.93903(15) 0.0464(11) Uani 1 1 d . . .
C1 C 0.7070(9) -0.0300(7) 0.9822(2) 0.0520(14) Uani 1 1 d . . .
C2 C 0.8694(8) -0.0163(7) 1.0237(2) 0.0562(14) Uani 1 1 d . . .
H2A H 0.9127 -0.1276 1.0352 0.067 Uiso 1 1 calc R . .
H2B H 0.8168 0.0465 1.0531 0.067 Uiso 1 1 calc R . .
C3 C 1.0479(8) 0.0768(10) 0.9987(2) 0.0639(15) Uani 1 1 d . . .
H3A H 1.1681 0.0038 0.9956 0.077 Uiso 1 1 calc R . .
H3B H 1.0857 0.1758 1.0187 0.077 Uiso 1 1 calc R . .
C4 C 0.9675(8) 0.1276(7) 0.9457(2) 0.0474(13) Uani 1 1 d . . .
N2 N 0.3828(7) 0.1258(6) 0.79464(15) 0.0565(12) Uani 1 1 d . . .
N3 N 0.0690(8) 0.1740(6) 0.65468(16) 0.0574(11) Uani 1 1 d . . .
C5 C 0.2021(9) 0.2082(7) 0.7913(2) 0.0564(15) Uani 1 1 d . . .
H5 H 0.1475 0.2558 0.8212 0.068 Uiso 1 1 calc R . .
C6 C 0.0934(9) 0.2262(7) 0.74637(19) 0.0536(13) Uani 1 1 d . . .
H6 H -0.0315 0.2851 0.7465 0.064 Uiso 1 1 calc R . .
C7 C 0.1668(8) 0.1578(7) 0.7003(2) 0.0460(13) Uani 1 1 d . . .
C8 C 0.3568(8) 0.0703(8) 0.7044(2) 0.0603(15) Uani 1 1 d . . .
H8 H 0.4157 0.0217 0.6752 0.072 Uiso 1 1 calc R . .
C9 C 0.4549(8) 0.0566(8) 0.7507(2) 0.0639(17) Uani 1 1 d . . .
H9 H 0.5784 -0.0039 0.7521 0.077 Uiso 1 1 calc R . .
C10 C -0.1179(10) 0.2752(9) 0.6499(2) 0.086(2) Uani 1 1 d . . .
H10A H -0.1663 0.2714 0.6149 0.129 Uiso 1 1 calc R . .
H10B H -0.0880 0.3902 0.6592 0.129 Uiso 1 1 calc R . .
H10C H -0.2230 0.2310 0.6724 0.129 Uiso 1 1 calc R . .
C11 C 0.1598(9) 0.1101(8) 0.6075(2) 0.0713(17) Uani 1 1 d . . .
H11A H 0.0678 0.1321 0.5792 0.107 Uiso 1 1 calc R . .
H11B H 0.1819 -0.0096 0.6106 0.107 Uiso 1 1 calc R . .
H11C H 0.2900 0.1655 0.6014 0.107 Uiso 1 1 calc R . .
 
loop_
 _atom_site_aniso_label
 _atom_site_aniso_U_11
 _atom_site_aniso_U_22
 _atom_site_aniso_U_33
 _atom_site_aniso_U_23
 _atom_site_aniso_U_13
 _atom_site_aniso_U_12
I001 0.05239(18) 0.05660(19) 0.04661(18) -0.00178(19) -0.00415(17) -0.00134(18)
O1 0.054(2) 0.080(3) 0.072(3) 0.005(3) 0.0043(17) -0.018(3)
O2 0.061(3) 0.082(3) 0.063(2) 0.000(2) 0.003(2) -0.013(2)
N1 0.045(2) 0.052(3) 0.042(2) -0.002(2) 0.0020(19) -0.003(2)
C1 0.051(3) 0.054(4) 0.051(3) -0.002(3) -0.001(3) 0.006(3)
C2 0.062(4) 0.057(3) 0.049(3) 0.004(3) -0.005(3) 0.008(3)
C3 0.052(3) 0.081(4) 0.059(3) -0.003(3) -0.014(2) -0.005(4)
C4 0.047(3) 0.046(3) 0.049(3) -0.003(3) 0.002(2) 0.001(2)
N2 0.060(3) 0.071(3) 0.038(2) 0.001(2) -0.007(2) 0.000(3)
N3 0.060(3) 0.064(3) 0.048(3) -0.001(2) -0.011(2) -0.001(3)
C5 0.063(4) 0.065(4) 0.041(3) -0.005(3) 0.007(3) 0.004(3)
C6 0.047(3) 0.067(3) 0.046(3) -0.001(3) -0.002(3) 0.004(3)
C7 0.050(3) 0.048(3) 0.039(3) 0.000(2) 0.000(2) -0.006(2)
C8 0.065(4) 0.074(4) 0.043(3) -0.012(3) 0.002(2) 0.019(3)
C9 0.055(4) 0.076(5) 0.061(4) -0.008(3) -0.006(3) 0.015(3)
C10 0.077(5) 0.111(5) 0.071(4) 0.002(4) -0.015(3) 0.025(4)
C11 0.099(5) 0.071(4) 0.044(3) -0.006(3) -0.007(3) -0.007(4)
 
_geom_special_details
;
 All esds (except the esd in the dihedral angle between two l.s. planes)
 are estimated using the full covariance matrix.  The cell esds are taken
 into account individually in the estimation of esds in distances, angles
 and torsion angles; correlations between esds in cell parameters are only
 used when they are defined by crystal symmetry.  An approximate (isotropic)
 treatment of cell esds is used for estimating esds involving l.s. planes.
;
 
loop_
 _geom_bond_atom_site_label_1
 _geom_bond_atom_site_label_2
 _geom_bond_distance
 _geom_bond_site_symmetry_2
 _geom_bond_publ_flag
I001 N1 2.146(4) . ?
I001 N2 2.407(4) . ?
O1 C1 1.214(7) . ?
O2 C4 1.206(6) . ?
N1 C1 1.375(7) . ?
N1 C4 1.383(7) . ?
C1 C2 1.508(7) . ?
C2 C3 1.512(7) . ?
C2 H2A 0.9700 . ?
C2 H2B 0.9700 . ?
C3 C4 1.523(7) . ?
C3 H3A 0.9700 . ?
C3 H3B 0.9700 . ?
N2 C5 1.338(7) . ?
N2 C9 1.346(7) . ?
N3 C7 1.347(7) . ?
N3 C11 1.448(7) . ?
N3 C10 1.452(8) . ?
C5 C6 1.369(7) . ?
C5 H5 0.9300 . ?
C6 C7 1.396(7) . ?
C6 H6 0.9300 . ?
C7 C8 1.411(7) . ?
C8 C9 1.364(7) . ?
C8 H8 0.9300 . ?
C9 H9 0.9300 . ?
C10 H10A 0.9600 . ?
C10 H10B 0.9600 . ?
C10 H10C 0.9600 . ?
C11 H11A 0.9600 . ?
C11 H11B 0.9600 . ?
C11 H11C 0.9600 . ?
 
loop_
 _geom_angle_atom_site_label_1
 _geom_angle_atom_site_label_2
 _geom_angle_atom_site_label_3
 _geom_angle
 _geom_angle_site_symmetry_1
 _geom_angle_site_symmetry_3
 _geom_angle_publ_flag
N1 I001 N2 178.94(16) . . ?
C1 N1 C4 112.6(4) . . ?
C1 N1 I001 123.5(3) . . ?
C4 N1 I001 123.6(3) . . ?
O1 C1 N1 124.5(5) . . ?
O1 C1 C2 126.4(5) . . ?
N1 C1 C2 109.2(5) . . ?
C1 C2 C3 104.8(4) . . ?
C1 C2 H2A 110.8 . . ?
C3 C2 H2A 110.8 . . ?
C1 C2 H2B 110.8 . . ?
C3 C2 H2B 110.8 . . ?
H2A C2 H2B 108.9 . . ?
C2 C3 C4 104.9(4) . . ?
C2 C3 H3A 110.8 . . ?
C4 C3 H3A 110.8 . . ?
C2 C3 H3B 110.8 . . ?
C4 C3 H3B 110.8 . . ?
H3A C3 H3B 108.8 . . ?
O2 C4 N1 124.9(5) . . ?
O2 C4 C3 127.0(5) . . ?
N1 C4 C3 108.1(5) . . ?
C5 N2 C9 116.4(4) . . ?
C5 N2 I001 126.1(4) . . ?
C9 N2 I001 117.5(4) . . ?
C7 N3 C11 121.3(5) . . ?
C7 N3 C10 121.1(5) . . ?
C11 N3 C10 117.1(4) . . ?
N2 C5 C6 123.5(5) . . ?
N2 C5 H5 118.3 . . ?
C6 C5 H5 118.3 . . ?
C5 C6 C7 121.1(5) . . ?
C5 C6 H6 119.5 . . ?
C7 C6 H6 119.5 . . ?
N3 C7 C6 123.9(5) . . ?
N3 C7 C8 121.3(5) . . ?
C6 C7 C8 114.9(5) . . ?
C9 C8 C7 120.5(5) . . ?
C9 C8 H8 119.7 . . ?
C7 C8 H8 119.7 . . ?
N2 C9 C8 123.6(5) . . ?
N2 C9 H9 118.2 . . ?
C8 C9 H9 118.2 . . ?
N3 C10 H10A 109.5 . . ?
N3 C10 H10B 109.5 . . ?
H10A C10 H10B 109.5 . . ?
N3 C10 H10C 109.5 . . ?
H10A C10 H10C 109.5 . . ?
H10B C10 H10C 109.5 . . ?
N3 C11 H11A 109.5 . . ?
N3 C11 H11B 109.5 . . ?
H11A C11 H11B 109.5 . . ?
N3 C11 H11C 109.5 . . ?
H11A C11 H11C 109.5 . . ?
H11B C11 H11C 109.5 . . ?
 
loop_
 _geom_torsion_atom_site_label_1
 _geom_torsion_atom_site_label_2
 _geom_torsion_atom_site_label_3
 _geom_torsion_atom_site_label_4
 _geom_torsion
 _geom_torsion_site_symmetry_1
 _geom_torsion_site_symmetry_2
 _geom_torsion_site_symmetry_3
 _geom_torsion_site_symmetry_4
 _geom_torsion_publ_flag
N2 I001 N1 C1 -109(9) . . . . ?
N2 I001 N1 C4 77(9) . . . . ?
C4 N1 C1 O1 179.0(5) . . . . ?
I001 N1 C1 O1 4.4(8) . . . . ?
C4 N1 C1 C2 -0.2(6) . . . . ?
I001 N1 C1 C2 -174.7(3) . . . . ?
O1 C1 C2 C3 177.1(6) . . . . ?
N1 C1 C2 C3 -3.8(6) . . . . ?
C1 C2 C3 C4 5.9(6) . . . . ?
C1 N1 C4 O2 -175.1(5) . . . . ?
I001 N1 C4 O2 -0.5(7) . . . . ?
C1 N1 C4 C3 4.1(6) . . . . ?
I001 N1 C4 C3 178.7(4) . . . . ?
C2 C3 C4 O2 172.9(5) . . . . ?
C2 C3 C4 N1 -6.2(6) . . . . ?
N1 I001 N2 C5 171(9) . . . . ?
N1 I001 N2 C9 -9(9) . . . . ?
C9 N2 C5 C6 -1.0(8) . . . . ?
I001 N2 C5 C6 179.2(4) . . . . ?
N2 C5 C6 C7 0.0(9) . . . . ?
C11 N3 C7 C6 175.7(5) . . . . ?
C10 N3 C7 C6 3.8(8) . . . . ?
C11 N3 C7 C8 -3.3(8) . . . . ?
C10 N3 C7 C8 -175.1(6) . . . . ?
C5 C6 C7 N3 -178.7(5) . . . . ?
C5 C6 C7 C8 0.3(8) . . . . ?
N3 C7 C8 C9 179.3(5) . . . . ?
C6 C7 C8 C9 0.3(9) . . . . ?
C5 N2 C9 C8 1.6(9) . . . . ?
I001 N2 C9 C8 -178.5(5) . . . . ?
C7 C8 C9 N2 -1.3(10) . . . . ?
 
_diffrn_measured_fraction_theta_max    0.997
_diffrn_reflns_theta_full              27.49
_diffrn_measured_fraction_theta_full   0.997
_refine_diff_density_max    0.880
_refine_diff_density_min   -0.431
_refine_diff_density_rms    0.088


#===END

 
data_NISac-Pic-RT 
 
_audit_creation_method            SHELXL-97 
_chemical_name_systematic 
; 
 ? 
; 
_chemical_name_common     'N-iodosaccharin/4-picoline'
_chemical_melting_point           ? 
_chemical_formula_moiety          
 'C13 H11 I N2 O3 S' 
_chemical_formula_sum 
 'C13 H11 I N2 O3 S' 
_chemical_formula_weight          402.20 
 
loop_ 
 _atom_type_symbol 
 _atom_type_description 
 _atom_type_scat_dispersion_real 
 _atom_type_scat_dispersion_imag 
 _atom_type_scat_source 
 'C'  'C'   0.0033   0.0016 
 'International Tables Vol C Tables 4.2.6.8 and 6.1.1.4' 
 'H'  'H'   0.0000   0.0000 
 'International Tables Vol C Tables 4.2.6.8 and 6.1.1.4' 
 'N'  'N'   0.0061   0.0033 
 'International Tables Vol C Tables 4.2.6.8 and 6.1.1.4' 
 'O'  'O'   0.0106   0.0060 
 'International Tables Vol C Tables 4.2.6.8 and 6.1.1.4' 
 'S'  'S'   0.1246   0.1234 
 'International Tables Vol C Tables 4.2.6.8 and 6.1.1.4' 
 'I'  'I'  -0.4742   1.8119 
 'International Tables Vol C Tables 4.2.6.8 and 6.1.1.4' 
 
_symmetry_cell_setting            triclinic 
_symmetry_space_group_name_H-M    P-1 
_symmetry_space_group_name_Hall   '-P 1' 
loop_ 
 _symmetry_equiv_pos_as_xyz 
 'x, y, z' 
 '-x, -y, -z' 
 
_cell_length_a                    7.8317(5) 
_cell_length_b                    8.6483(3) 
_cell_length_c                    11.7431(13) 
_cell_angle_alpha                 106.618(6) 
_cell_angle_beta                  99.711(8) 
_cell_angle_gamma                 98.224(3) 
_cell_volume                      735.66(10) 
_cell_formula_units_Z             2 
_cell_measurement_temperature     293(2) 
_cell_measurement_reflns_used     2629 
_cell_measurement_theta_min       3.56 
_cell_measurement_theta_max       27.49 
 
_exptl_crystal_description        prism 
_exptl_crystal_colour             colorless 
_exptl_crystal_size_max           0.25 
_exptl_crystal_size_mid           0.14 
_exptl_crystal_size_min           0.07 
_exptl_crystal_density_meas       ? 
_exptl_crystal_density_diffrn     1.816 
_exptl_crystal_density_method     'not measured' 
_exptl_crystal_F_000              392 
_exptl_absorpt_coefficient_mu     2.326 
_exptl_absorpt_correction_type                              multi-scan
_exptl_absorpt_process_details
;
  [Sheldrick, G.M. (2002). SADABS Bruker AXS Inc., Madison, Wisconsin, USA]
;
_exptl_absorpt_correction_T_min                      0.683
_exptl_absorpt_correction_T_max                      0.850

#------------------------------- Remark -------------------------------------#
# TWINABS output:                                                            #
#  3490 Corrected reflections written to file twin5.hkl                      #  
#  Reflections merged according to point-group -1                            #  
#  Ratio of minimum to maximum apparent transmission:  0.737033              #  
#                                                                            #
# The ratio of these values is more reliable than their absolute values!     #
#----------------------------------------------------------------------------#

 
_diffrn_ambient_temperature       293(2) 
_diffrn_radiation_wavelength      0.71073
_diffrn_radiation_type            MoK\a
_diffrn_radiation_source          'fine-focus sealed tube'
_diffrn_measurement_device_type   'KappaCCD'
_diffrn_measurement_device        '95mm CCD camera on \k-goniostat'
_diffrn_detector_area_resol_mean  9
_diffrn_radiation_monochromator   'horizonally mounted graphite crystal'
_diffrn_measurement_method        'CCD'
_diffrn_standards_number          ? 
_diffrn_standards_interval_count  ? 
_diffrn_standards_interval_time   ? 
_diffrn_standards_decay_%         ? 
_diffrn_reflns_number             3374 
_diffrn_reflns_av_R_equivalents   0.0000 
_diffrn_reflns_av_sigmaI/netI     0.0204 
_diffrn_reflns_limit_h_min        -10 
_diffrn_reflns_limit_h_max        10 
_diffrn_reflns_limit_k_min        -11 
_diffrn_reflns_limit_k_max        10 
_diffrn_reflns_limit_l_min        0 
_diffrn_reflns_limit_l_max        15 
_diffrn_reflns_theta_min          3.57 
_diffrn_reflns_theta_max          27.85 
_reflns_number_total              3374 
_reflns_number_gt                 2815 
_reflns_threshold_expression      >2sigma(I) 
 
_computing_data_collection        'Collect (Bruker AXS BV, 1997-2004)'
_computing_cell_refinement        'Dirax/lsq (Duisenberg & Schreurs, 1989-2000)'
_computing_data_reduction         'EvalCCD (Duisenberg & Schreurs 1990-2000)'
_computing_structure_solution     'SIR92 (Altomare et al., 1993)'
_computing_structure_refinement   'SHELXL-97 (Sheldrick, 1997)'
_computing_molecular_graphics     'Ortep-3 for Windows (Farrugia, 1997)'
_computing_publication_material   'WinGX publication routines (Farrugia, 1999)'

 
_refine_special_details 
; 
 Refinement of F^2^ against ALL reflections.  The weighted R-factor wR and 
 goodness of fit S are based on F^2^, conventional R-factors R are based 
 on F, with F set to zero for negative F^2^. The threshold expression of 
 F^2^ > 2sigma(F^2^) is used only for calculating R-factors(gt) etc. and is 
 not relevant to the choice of reflections for refinement.  R-factors based 
 on F^2^ are statistically about twice as large as those based on F, and R- 
 factors based on ALL data will be even larger. 

Twin refinment from hklF5 file

    12582 data (   3258 unique ) involve component  1 only,  mean I/sigma  23.8
    12461 data (   3249 unique ) involve component  2 only,  mean I/sigma  16.9
      372 data (    116 unique ) involve   2 components,  mean I/sigma  45.8

; 

 
_refine_ls_structure_factor_coef  Fsqd  
_refine_ls_matrix_type            full 
_refine_ls_weighting_scheme       calc  
_refine_ls_weighting_details 
 'calc w=1/[\s^2^(Fo^2^)+(0.0287P)^2^+0.5233P] where P=(Fo^2^+2Fc^2^)/3' 
_atom_sites_solution_primary      direct 
_atom_sites_solution_secondary    difmap 
_atom_sites_solution_hydrogens    geom 
_refine_ls_hydrogen_treatment     constr
_refine_ls_extinction_method      none 
_refine_ls_extinction_coef        ? 
_refine_ls_number_reflns          3374 
_refine_ls_number_parameters      183 
_refine_ls_number_restraints      0 
_refine_ls_R_factor_all           0.0422 
_refine_ls_R_factor_gt            0.0288 
_refine_ls_wR_factor_ref          0.0679 
_refine_ls_wR_factor_gt           0.0635 
_refine_ls_goodness_of_fit_ref    1.095 
_refine_ls_restrained_S_all       1.095 
_refine_ls_shift/su_max           0.001 
_refine_ls_shift/su_mean          0.000 
 
loop_ 
 _atom_site_label 
 _atom_site_type_symbol 
 _atom_site_fract_x 
 _atom_site_fract_y 
 _atom_site_fract_z 
 _atom_site_U_iso_or_equiv 
 _atom_site_adp_type 
 _atom_site_occupancy 
 _atom_site_symmetry_multiplicity 
 _atom_site_calc_flag 
 _atom_site_refinement_flags 
 _atom_site_disorder_assembly 
 _atom_site_disorder_group 
C1 C 0.6586(4) -0.1418(4) 0.8355(3) 0.0382(7) Uani 1 1 d . . . 
C2 C 0.6392(5) -0.1659(4) 0.9443(3) 0.0512(9) Uani 1 1 d . . . 
H2 H 0.6464 -0.0782 1.0140 0.061 Uiso 1 1 calc R . . 
C3 C 0.6082(5) -0.3285(5) 0.9440(4) 0.0557(9) Uani 1 1 d . . . 
H3 H 0.5958 -0.3501 1.0156 0.067 Uiso 1 1 calc R . . 
C4 C 0.5955(5) -0.4575(4) 0.8412(4) 0.0549(9) Uani 1 1 d . . . 
H4 H 0.5762 -0.5645 0.8448 0.066 Uiso 1 1 calc R . . 
C5 C 0.6107(5) -0.4322(4) 0.7321(3) 0.0474(8) Uani 1 1 d . . . 
H5 H 0.5985 -0.5204 0.6618 0.057 Uiso 1 1 calc R . . 
C6 C 0.6448(4) -0.2704(4) 0.7307(3) 0.0365(7) Uani 1 1 d . . . 
C7 C 0.6721(5) -0.2125(4) 0.6263(3) 0.0421(7) Uani 1 1 d . . . 
C8 C 0.8683(5) 0.1421(4) 0.2901(3) 0.0475(8) Uani 1 1 d . . . 
H8 H 0.8783 0.0326 0.2754 0.057 Uiso 1 1 calc R . . 
C9 C 0.9017(5) 0.2184(5) 0.2067(3) 0.0497(8) Uani 1 1 d . . . 
H9 H 0.9354 0.1607 0.1370 0.060 Uiso 1 1 calc R . . 
C10 C 0.8859(4) 0.3805(4) 0.2247(3) 0.0439(8) Uani 1 1 d . . . 
C11 C 0.8376(5) 0.4603(4) 0.3315(3) 0.0496(8) Uani 1 1 d . . . 
H11 H 0.8265 0.5697 0.3484 0.059 Uiso 1 1 calc R . . 
C12 C 0.8065(5) 0.3777(4) 0.4117(3) 0.0475(8) Uani 1 1 d . . . 
H12 H 0.7736 0.4332 0.4824 0.057 Uiso 1 1 calc R . . 
C13 C 0.9191(6) 0.4670(5) 0.1341(4) 0.0644(11) Uani 1 1 d . . . 
H13A H 0.9222 0.5825 0.1690 0.097 Uiso 1 1 calc R . . 
H13B H 0.8260 0.4220 0.0621 0.097 Uiso 1 1 calc R . . 
H13C H 1.0303 0.4519 0.1133 0.097 Uiso 1 1 calc R . . 
N1 N 0.7048(4) -0.0436(3) 0.6609(2) 0.0441(6) Uani 1 1 d . . . 
N2 N 0.8210(4) 0.2217(3) 0.3933(2) 0.0440(6) Uani 1 1 d . . . 
O1 O 0.5667(5) 0.1327(3) 0.8167(3) 0.0799(10) Uani 1 1 d . . . 
O2 O 0.8814(5) 0.1331(3) 0.8689(3) 0.0762(9) Uani 1 1 d . . . 
O3 O 0.6676(4) -0.3011(3) 0.5244(2) 0.0623(7) Uani 1 1 d . . . 
S1 S 0.70722(14) 0.04521(9) 0.80460(8) 0.0489(2) Uani 1 1 d . . . 
I1 I 0.76404(3) 0.09021(3) 0.53209(2) 0.04276(9) Uani 1 1 d . . . 
 
loop_ 
 _atom_site_aniso_label 
 _atom_site_aniso_U_11 
 _atom_site_aniso_U_22 
 _atom_site_aniso_U_33 
 _atom_site_aniso_U_23 
 _atom_site_aniso_U_13 
 _atom_site_aniso_U_12 
C1 0.0528(18) 0.0296(15) 0.0379(16) 0.0149(13) 0.0166(14) 0.0101(13) 
C2 0.075(2) 0.0454(19) 0.0401(19) 0.0172(15) 0.0237(18) 0.0136(18) 
C3 0.075(3) 0.056(2) 0.054(2) 0.0345(19) 0.0270(19) 0.0194(19) 
C4 0.069(2) 0.0392(18) 0.071(3) 0.0317(18) 0.026(2) 0.0139(17) 
C5 0.059(2) 0.0305(16) 0.054(2) 0.0134(15) 0.0181(17) 0.0079(15) 
C6 0.0464(17) 0.0302(15) 0.0352(16) 0.0108(12) 0.0138(13) 0.0088(13) 
C7 0.056(2) 0.0341(16) 0.0369(17) 0.0097(14) 0.0145(15) 0.0106(14) 
C8 0.058(2) 0.0402(18) 0.049(2) 0.0159(15) 0.0196(17) 0.0109(15) 
C9 0.058(2) 0.054(2) 0.0405(18) 0.0150(16) 0.0211(16) 0.0098(17) 
C10 0.0402(17) 0.056(2) 0.0391(18) 0.0236(16) 0.0083(14) 0.0030(15) 
C11 0.058(2) 0.0459(19) 0.051(2) 0.0223(16) 0.0159(17) 0.0116(16) 
C12 0.059(2) 0.0460(19) 0.0443(19) 0.0177(15) 0.0219(16) 0.0124(16) 
C13 0.077(3) 0.074(3) 0.055(2) 0.038(2) 0.021(2) 0.011(2) 
N1 0.0720(19) 0.0332(13) 0.0357(14) 0.0164(11) 0.0222(13) 0.0142(13) 
N2 0.0479(16) 0.0486(16) 0.0408(15) 0.0206(13) 0.0149(13) 0.0073(13) 
O1 0.140(3) 0.0521(16) 0.084(2) 0.0349(15) 0.069(2) 0.0541(18) 
O2 0.111(2) 0.0472(15) 0.0516(16) 0.0059(13) 0.0165(16) -0.0214(16) 
O3 0.107(2) 0.0431(14) 0.0366(13) 0.0062(11) 0.0266(14) 0.0141(14) 
S1 0.0869(7) 0.0260(4) 0.0393(4) 0.0109(3) 0.0288(4) 0.0105(4) 
I1 0.04970(14) 0.04401(13) 0.04303(13) 0.02129(10) 0.01767(9) 0.01210(9) 
 
_geom_special_details 
; 
 All esds (except the esd in the dihedral angle between two l.s. planes) 
 are estimated using the full covariance matrix.  The cell esds are taken 
 into account individually in the estimation of esds in distances, angles 
 and torsion angles; correlations between esds in cell parameters are only 
 used when they are defined by crystal symmetry.  An approximate (isotropic) 
 treatment of cell esds is used for estimating esds involving l.s. planes. 
; 
 
loop_ 
 _geom_bond_atom_site_label_1 
 _geom_bond_atom_site_label_2 
 _geom_bond_distance 
 _geom_bond_site_symmetry_2 
 _geom_bond_publ_flag 
C1 C6 1.379(4) . ? 
C1 C2 1.381(4) . ? 
C1 S1 1.760(3) . ? 
C2 C3 1.392(5) . ? 
C2 H2 0.9300 . ? 
C3 C4 1.367(5) . ? 
C3 H3 0.9300 . ? 
C4 C5 1.381(5) . ? 
C4 H4 0.9300 . ? 
C5 C6 1.392(4) . ? 
C5 H5 0.9300 . ? 
C6 C7 1.486(4) . ? 
C7 O3 1.215(4) . ? 
C7 N1 1.372(4) . ? 
C8 N2 1.352(4) . ? 
C8 C9 1.368(5) . ? 
C8 H8 0.9300 . ? 
C9 C10 1.384(5) . ? 
C9 H9 0.9300 . ? 
C10 C11 1.390(5) . ? 
C10 C13 1.500(5) . ? 
C11 C12 1.367(5) . ? 
C11 H11 0.9300 . ? 
C12 N2 1.328(4) . ? 
C12 H12 0.9300 . ? 
C13 H13A 0.9600 . ? 
C13 H13B 0.9600 . ? 
C13 H13C 0.9600 . ? 
N1 S1 1.638(3) . ? 
N1 I1 2.220(2) . ? 
N2 I1 2.305(3) . ? 
O1 S1 1.426(3) . ? 
O2 S1 1.427(3) . ? 
 
loop_ 
 _geom_angle_atom_site_label_1 
 _geom_angle_atom_site_label_2 
 _geom_angle_atom_site_label_3 
 _geom_angle 
 _geom_angle_site_symmetry_1 
 _geom_angle_site_symmetry_3 
 _geom_angle_publ_flag 
C6 C1 C2 122.6(3) . . ? 
C6 C1 S1 108.8(2) . . ? 
C2 C1 S1 128.6(3) . . ? 
C1 C2 C3 116.3(3) . . ? 
C1 C2 H2 121.8 . . ? 
C3 C2 H2 121.8 . . ? 
C4 C3 C2 121.8(3) . . ? 
C4 C3 H3 119.1 . . ? 
C2 C3 H3 119.1 . . ? 
C3 C4 C5 121.3(3) . . ? 
C3 C4 H4 119.3 . . ? 
C5 C4 H4 119.3 . . ? 
C4 C5 C6 117.9(3) . . ? 
C4 C5 H5 121.1 . . ? 
C6 C5 H5 121.1 . . ? 
C1 C6 C5 119.9(3) . . ? 
C1 C6 C7 112.4(3) . . ? 
C5 C6 C7 127.7(3) . . ? 
O3 C7 N1 124.2(3) . . ? 
O3 C7 C6 125.2(3) . . ? 
N1 C7 C6 110.6(3) . . ? 
N2 C8 C9 121.6(3) . . ? 
N2 C8 H8 119.2 . . ? 
C9 C8 H8 119.2 . . ? 
C8 C9 C10 120.8(3) . . ? 
C8 C9 H9 119.6 . . ? 
C10 C9 H9 119.6 . . ? 
C9 C10 C11 116.6(3) . . ? 
C9 C10 C13 122.1(3) . . ? 
C11 C10 C13 121.3(3) . . ? 
C12 C11 C10 119.9(3) . . ? 
C12 C11 H11 120.0 . . ? 
C10 C11 H11 120.0 . . ? 
N2 C12 C11 123.0(3) . . ? 
N2 C12 H12 118.5 . . ? 
C11 C12 H12 118.5 . . ? 
C10 C13 H13A 109.5 . . ? 
C10 C13 H13B 109.5 . . ? 
H13A C13 H13B 109.5 . . ? 
C10 C13 H13C 109.5 . . ? 
H13A C13 H13C 109.5 . . ? 
H13B C13 H13C 109.5 . . ? 
C7 N1 S1 113.9(2) . . ? 
C7 N1 I1 121.4(2) . . ? 
S1 N1 I1 124.57(14) . . ? 
C12 N2 C8 118.0(3) . . ? 
C12 N2 I1 120.9(2) . . ? 
C8 N2 I1 121.0(2) . . ? 
O1 S1 O2 117.3(2) . . ? 
O1 S1 N1 110.95(18) . . ? 
O2 S1 N1 110.24(17) . . ? 
O1 S1 C1 111.06(17) . . ? 
O2 S1 C1 110.57(17) . . ? 
N1 S1 C1 94.34(14) . . ? 
N1 I1 N2 178.18(10) . . ? 
 
loop_ 
 _geom_torsion_atom_site_label_1 
 _geom_torsion_atom_site_label_2 
 _geom_torsion_atom_site_label_3 
 _geom_torsion_atom_site_label_4 
 _geom_torsion 
 _geom_torsion_site_symmetry_1 
 _geom_torsion_site_symmetry_2 
 _geom_torsion_site_symmetry_3 
 _geom_torsion_site_symmetry_4 
 _geom_torsion_publ_flag 
C6 C1 C2 C3 1.3(6) . . . . ? 
S1 C1 C2 C3 -177.2(3) . . . . ? 
C1 C2 C3 C4 -0.8(6) . . . . ? 
C2 C3 C4 C5 -0.8(6) . . . . ? 
C3 C4 C5 C6 1.9(6) . . . . ? 
C2 C1 C6 C5 -0.2(5) . . . . ? 
S1 C1 C6 C5 178.5(3) . . . . ? 
C2 C1 C6 C7 -179.6(3) . . . . ? 
S1 C1 C6 C7 -0.8(4) . . . . ? 
C4 C5 C6 C1 -1.4(5) . . . . ? 
C4 C5 C6 C7 177.9(3) . . . . ? 
C1 C6 C7 O3 179.6(4) . . . . ? 
C5 C6 C7 O3 0.4(6) . . . . ? 
C1 C6 C7 N1 0.1(4) . . . . ? 
C5 C6 C7 N1 -179.2(3) . . . . ? 
N2 C8 C9 C10 -0.8(6) . . . . ? 
C8 C9 C10 C11 0.9(5) . . . . ? 
C8 C9 C10 C13 -179.1(4) . . . . ? 
C9 C10 C11 C12 -0.7(5) . . . . ? 
C13 C10 C11 C12 179.3(4) . . . . ? 
C10 C11 C12 N2 0.4(6) . . . . ? 
O3 C7 N1 S1 -178.8(3) . . . . ? 
C6 C7 N1 S1 0.8(4) . . . . ? 
O3 C7 N1 I1 -2.3(5) . . . . ? 
C6 C7 N1 I1 177.3(2) . . . . ? 
C11 C12 N2 C8 -0.2(5) . . . . ? 
C11 C12 N2 I1 -179.5(3) . . . . ? 
C9 C8 N2 C12 0.4(5) . . . . ? 
C9 C8 N2 I1 179.7(3) . . . . ? 
C7 N1 S1 O1 -115.6(3) . . . . ? 
I1 N1 S1 O1 68.0(2) . . . . ? 
C7 N1 S1 O2 112.7(3) . . . . ? 
I1 N1 S1 O2 -63.7(2) . . . . ? 
C7 N1 S1 C1 -1.1(3) . . . . ? 
I1 N1 S1 C1 -177.50(19) . . . . ? 
C6 C1 S1 O1 115.5(3) . . . . ? 
C2 C1 S1 O1 -65.8(4) . . . . ? 
C6 C1 S1 O2 -112.4(3) . . . . ? 
C2 C1 S1 O2 66.3(4) . . . . ? 
C6 C1 S1 N1 1.1(3) . . . . ? 
C2 C1 S1 N1 179.8(3) . . . . ? 
C7 N1 I1 N2 23(3) . . . . ? 
S1 N1 I1 N2 -161(3) . . . . ? 
C12 N2 I1 N1 139(3) . . . . ? 
C8 N2 I1 N1 -40(3) . . . . ? 
 
_diffrn_measured_fraction_theta_max    0.963 
_diffrn_reflns_theta_full              27.85 
_diffrn_measured_fraction_theta_full   0.963 
_refine_diff_density_max    0.671 
_refine_diff_density_min   -0.502 
_refine_diff_density_rms    0.086 


#===END


 
data_NISac-pic-150K 
 
_audit_creation_method            SHELXL-97 
_chemical_name_systematic 
; 
 ? 
; 
_chemical_name_common     'N-iodosaccharin/4-picoline'
_chemical_melting_point           ? 
_chemical_formula_moiety          
 'C13 H11 I N2 O3 S'  
_chemical_formula_sum 
 'C13 H11 I N2 O3 S' 
_chemical_formula_weight          402.20 
 
loop_ 
 _atom_type_symbol 
 _atom_type_description 
 _atom_type_scat_dispersion_real 
 _atom_type_scat_dispersion_imag 
 _atom_type_scat_source 
 'C'  'C'   0.0033   0.0016 
 'International Tables Vol C Tables 4.2.6.8 and 6.1.1.4' 
 'H'  'H'   0.0000   0.0000 
 'International Tables Vol C Tables 4.2.6.8 and 6.1.1.4' 
 'N'  'N'   0.0061   0.0033 
 'International Tables Vol C Tables 4.2.6.8 and 6.1.1.4' 
 'O'  'O'   0.0106   0.0060 
 'International Tables Vol C Tables 4.2.6.8 and 6.1.1.4' 
 'S'  'S'   0.1246   0.1234 
 'International Tables Vol C Tables 4.2.6.8 and 6.1.1.4' 
 'I'  'I'  -0.4742   1.8119 
 'International Tables Vol C Tables 4.2.6.8 and 6.1.1.4' 
 
_symmetry_cell_setting            triclinic
_symmetry_space_group_name_H-M    P-1 
_symmetry_space_group_name_Hall   '-P 1'
 
loop_ 
 _symmetry_equiv_pos_as_xyz 
 'x, y, z' 
 '-x, -y, -z' 
 
_cell_length_a                    7.6973(3) 
_cell_length_b                    8.6302(3) 
_cell_length_c                    11.6836(4) 
_cell_angle_alpha                 106.797(2) 
_cell_angle_beta                  100.216(2) 
_cell_angle_gamma                 98.149(2) 
_cell_volume                      715.73(4) 
_cell_formula_units_Z             2 
_cell_measurement_temperature         150(2)
_cell_measurement_reflns_used            4905
_cell_measurement_theta_min              2.75
_cell_measurement_theta_max             27.42

 
_exptl_crystal_description        prism 
_exptl_crystal_colour             colorless 
_exptl_crystal_size_max           0.03
_exptl_crystal_size_mid           0.02 
_exptl_crystal_size_min           0.01 
_exptl_crystal_density_meas       ? 
_exptl_crystal_density_diffrn     1.866 
_exptl_crystal_density_method     'not measured' 
_exptl_crystal_F_000              392 
_exptl_absorpt_coefficient_mu     2.391 
_exptl_absorpt_correction_type                              multi-scan
_exptl_absorpt_process_details
;
  [Sheldrick, G.M. (2002). SADABS Bruker AXS Inc., Madison, Wisconsin, USA]
;
_exptl_absorpt_correction_T_min                      0.944
_exptl_absorpt_correction_T_max                      0.976

#------------------------------- Remark -------------------------------------#
# SADABS output:                                                             #
# Estimated minimum and maximum transmission:  0.6612  0.7456                #
# The ratio of these values is more reliable than their absolute values!     #
#----------------------------------------------------------------------------#

 
_diffrn_ambient_temperature       150(2)
_diffrn_radiation_wavelength      0.71073
_diffrn_radiation_type            MoK\a
_diffrn_radiation_source          'fine-focus sealed tube'
_diffrn_radiation_monochromator   graphite
_diffrn_measurement_device_type    'APEXII, Bruker-AXS'
_diffrn_measurement_method         'CCD rotation images, thin slices'
_diffrn_detector                   'CCD plate'
_diffrn_standards_number          ? 
_diffrn_standards_interval_count  ? 
_diffrn_standards_interval_time   ? 
_diffrn_standards_decay_%         ? 
_diffrn_reflns_number             9764 
_diffrn_reflns_av_R_equivalents   0.0355 
_diffrn_reflns_av_sigmaI/netI     0.0383 
_diffrn_reflns_limit_h_min        -9 
_diffrn_reflns_limit_h_max        9 
_diffrn_reflns_limit_k_min        -10 
_diffrn_reflns_limit_k_max        11 
_diffrn_reflns_limit_l_min        -15 
_diffrn_reflns_limit_l_max        13 
_diffrn_reflns_theta_min          1.87 
_diffrn_reflns_theta_max          27.47 
_reflns_number_total              3252 
_reflns_number_gt                 2957 
_reflns_threshold_expression      >2sigma(I) 
 
_computing_data_collection       'Bruker SAINT'
_computing_cell_refinement       'Bruker SMART'
_computing_data_reduction        'Bruker SAINT'
_computing_structure_solution    'SIR97 (Altomare et al., 1999)'
_computing_structure_refinement  'SHELXL-97 (Sheldrick, 1997)'
_computing_molecular_graphics    'Ortep-3 for Windows (Farrugia, 1997)'
_computing_publication_material  'WinGX publication routines (Farrugia, 1999)'
 

 
_refine_special_details 
; 
 Refinement of F^2^ against ALL reflections.  The weighted R-factor wR and 
 goodness of fit S are based on F^2^, conventional R-factors R are based 
 on F, with F set to zero for negative F^2^. The threshold expression of 
 F^2^ > 2sigma(F^2^) is used only for calculating R-factors(gt) etc. and is 
 not relevant to the choice of reflections for refinement.  R-factors based 
 on F^2^ are statistically about twice as large as those based on F, and R- 
 factors based on ALL data will be even larger. 
; 
 
_refine_ls_structure_factor_coef  Fsqd  
_refine_ls_matrix_type            full 
_refine_ls_weighting_scheme       calc  
_refine_ls_weighting_details 
 'calc w=1/[\s^2^(Fo^2^)+(0.0474P)^2^+0.0000P] where P=(Fo^2^+2Fc^2^)/3' 
_atom_sites_solution_primary      direct 
_atom_sites_solution_secondary    difmap 
_atom_sites_solution_hydrogens    geom 
_refine_ls_hydrogen_treatment     constr
_refine_ls_extinction_method      none 
_refine_ls_extinction_coef        ? 
_refine_ls_number_reflns          3252 
_refine_ls_number_parameters      182 
_refine_ls_number_restraints      0 
_refine_ls_R_factor_all           0.0320 
_refine_ls_R_factor_gt            0.0268 
_refine_ls_wR_factor_ref          0.0864 
_refine_ls_wR_factor_gt           0.0723 
_refine_ls_goodness_of_fit_ref    1.169 
_refine_ls_restrained_S_all       1.169 
_refine_ls_shift/su_max           0.000 
_refine_ls_shift/su_mean          0.000 
 
loop_ 
 _atom_site_label 
 _atom_site_type_symbol 
 _atom_site_fract_x 
 _atom_site_fract_y 
 _atom_site_fract_z 
 _atom_site_U_iso_or_equiv 
 _atom_site_adp_type 
 _atom_site_occupancy 
 _atom_site_symmetry_multiplicity 
 _atom_site_calc_flag 
 _atom_site_refinement_flags 
 _atom_site_disorder_assembly 
 _atom_site_disorder_group 
C1 C 0.3273(4) 0.7152(4) -0.1253(3) 0.0221(7) Uani 1 1 d . . . 
C2 C 0.3549(4) 0.7735(4) -0.2306(3) 0.0190(7) Uani 1 1 d . . . 
C3 C 0.3426(4) 0.6439(4) -0.3362(3) 0.0194(7) Uani 1 1 d . . . 
C4 C 0.3625(5) 0.6687(5) -0.4448(3) 0.0245(7) Uani 1 1 d . . . 
H4 H 0.3560 0.5808 -0.5150 0.029 Uiso 1 1 calc R . . 
C5 C 0.3929(5) 0.8321(5) -0.4444(4) 0.0283(8) Uani 1 1 d . . . 
H5 H 0.4057 0.8538 -0.5162 0.034 Uiso 1 1 calc R . . 
C6 C 0.4042(5) 0.9607(5) -0.3411(4) 0.0268(8) Uani 1 1 d . . . 
H6 H 0.4240 1.0681 -0.3442 0.032 Uiso 1 1 calc R . . 
C7 C 0.3868(5) 0.9351(4) -0.2314(3) 0.0230(7) Uani 1 1 d . . . 
H7 H 0.3963 1.0234 -0.1609 0.028 Uiso 1 1 calc R . . 
C8 C 0.1311(5) 0.3613(5) 0.2113(3) 0.0251(8) Uani 1 1 d . . . 
H8 H 0.1197 0.4707 0.2253 0.030 Uiso 1 1 calc R . . 
C9 C 0.1002(5) 0.2865(5) 0.2968(3) 0.0244(8) Uani 1 1 d . . . 
H9 H 0.0694 0.3456 0.3678 0.029 Uiso 1 1 calc R . . 
C10 C 0.1151(4) 0.1219(5) 0.2774(3) 0.0223(7) Uani 1 1 d . . . 
C11 C 0.1636(5) 0.0412(5) 0.1701(3) 0.0245(8) Uani 1 1 d . . . 
H11 H 0.1759 -0.0683 0.1535 0.029 Uiso 1 1 calc R . . 
C12 C 0.1933(5) 0.1236(5) 0.0886(3) 0.0246(8) Uani 1 1 d . . . 
H12 H 0.2260 0.0679 0.0173 0.030 Uiso 1 1 calc R . . 
C13 C 0.0842(5) 0.0375(5) 0.3694(4) 0.0321(9) Uani 1 1 d . . . 
H13A H 0.0339 -0.0778 0.3277 0.048 Uiso 1 1 calc R . . 
H13B H 0.0021 0.0866 0.4145 0.048 Uiso 1 1 calc R . . 
H13C H 0.1968 0.0495 0.4252 0.048 Uiso 1 1 calc R . . 
N1 N 0.2950(4) 0.5448(4) -0.1611(3) 0.0228(6) Uani 1 1 d . . . 
N2 N 0.1772(4) 0.2806(4) 0.1078(3) 0.0212(6) Uani 1 1 d . . . 
O1 O 0.3309(4) 0.8044(3) -0.0228(2) 0.0316(6) Uani 1 1 d . . . 
O2 O 0.1141(4) 0.3668(3) -0.3727(2) 0.0383(7) Uani 1 1 d . . . 
O3 O 0.4355(4) 0.3678(3) -0.3179(3) 0.0394(7) Uani 1 1 d . . . 
S1 S 0.29256(13) 0.45623(11) -0.30594(8) 0.0241(2) Uani 1 1 d . . . 
I1 I 0.23531(3) 0.41095(3) -0.031605(18) 0.02089(10) Uani 1 1 d . . . 
 
loop_ 
 _atom_site_aniso_label 
 _atom_site_aniso_U_11 
 _atom_site_aniso_U_22 
 _atom_site_aniso_U_33 
 _atom_site_aniso_U_23 
 _atom_site_aniso_U_13 
 _atom_site_aniso_U_12 
C1 0.0257(17) 0.0185(18) 0.0235(18) 0.0081(15) 0.0062(14) 0.0049(14) 
C2 0.0212(16) 0.0163(17) 0.0188(17) 0.0050(14) 0.0052(13) 0.0026(13) 
C3 0.0246(16) 0.0142(17) 0.0207(17) 0.0064(13) 0.0066(13) 0.0044(13) 
C4 0.0331(18) 0.0222(19) 0.0218(18) 0.0087(15) 0.0113(15) 0.0070(15) 
C5 0.0348(19) 0.031(2) 0.0258(19) 0.0157(17) 0.0113(16) 0.0104(16) 
C6 0.0285(18) 0.0206(19) 0.038(2) 0.0169(17) 0.0127(16) 0.0060(15) 
C7 0.0273(17) 0.0158(18) 0.0254(18) 0.0046(14) 0.0088(14) 0.0034(14) 
C8 0.0253(17) 0.025(2) 0.0274(19) 0.0097(16) 0.0091(15) 0.0069(15) 
C9 0.0255(17) 0.029(2) 0.0196(17) 0.0078(15) 0.0086(14) 0.0054(15) 
C10 0.0168(15) 0.029(2) 0.0208(17) 0.0118(15) 0.0026(13) -0.0012(14) 
C11 0.0297(18) 0.0197(19) 0.0261(19) 0.0087(15) 0.0087(15) 0.0055(14) 
C12 0.0294(18) 0.025(2) 0.0221(18) 0.0094(15) 0.0091(14) 0.0074(15) 
C13 0.034(2) 0.036(2) 0.032(2) 0.0189(19) 0.0121(17) 0.0047(17) 
N1 0.0363(16) 0.0165(15) 0.0181(14) 0.0064(12) 0.0106(12) 0.0062(13) 
N2 0.0229(14) 0.0227(16) 0.0208(15) 0.0110(13) 0.0068(12) 0.0029(12) 
O1 0.0523(16) 0.0215(14) 0.0187(13) 0.0019(11) 0.0110(12) 0.0069(12) 
O2 0.0566(17) 0.0235(15) 0.0252(14) 0.0026(12) 0.0095(13) -0.0113(13) 
O3 0.069(2) 0.0256(15) 0.0448(17) 0.0195(13) 0.0399(16) 0.0280(14) 
S1 0.0432(5) 0.0131(4) 0.0194(4) 0.0057(3) 0.0153(4) 0.0059(4) 
I1 0.02437(14) 0.02148(15) 0.02127(14) 0.01062(10) 0.00895(9) 0.00634(9) 
 
_geom_special_details 
; 
 All esds (except the esd in the dihedral angle between two l.s. planes) 
 are estimated using the full covariance matrix.  The cell esds are taken 
 into account individually in the estimation of esds in distances, angles 
 and torsion angles; correlations between esds in cell parameters are only 
 used when they are defined by crystal symmetry.  An approximate (isotropic) 
 treatment of cell esds is used for estimating esds involving l.s. planes. 
; 
 
loop_ 
 _geom_bond_atom_site_label_1 
 _geom_bond_atom_site_label_2 
 _geom_bond_distance 
 _geom_bond_site_symmetry_2 
 _geom_bond_publ_flag 
C1 O1 1.215(4) . ? 
C1 N1 1.379(5) . ? 
C1 C2 1.493(5) . ? 
C2 C3 1.384(5) . ? 
C2 C7 1.385(5) . ? 
C3 C4 1.377(5) . ? 
C3 S1 1.760(3) . ? 
C4 C5 1.395(5) . ? 
C4 H4 0.9300 . ? 
C5 C6 1.363(6) . ? 
C5 H5 0.9300 . ? 
C6 C7 1.387(5) . ? 
C6 H6 0.9300 . ? 
C7 H7 0.9300 . ? 
C8 N2 1.345(5) . ? 
C8 C9 1.372(5) . ? 
C8 H8 0.9300 . ? 
C9 C10 1.397(5) . ? 
C9 H9 0.9300 . ? 
C10 C11 1.390(5) . ? 
C10 C13 1.496(5) . ? 
C11 C12 1.374(5) . ? 
C11 H11 0.9300 . ? 
C12 N2 1.336(5) . ? 
C12 H12 0.9300 . ? 
C13 H13A 0.9600 . ? 
C13 H13B 0.9600 . ? 
C13 H13C 0.9600 . ? 
N1 S1 1.639(3) . ? 
N1 I1 2.223(3) . ? 
N2 I1 2.301(3) . ? 
O2 S1 1.436(3) . ? 
O3 S1 1.429(3) . ? 
 
loop_ 
 _geom_angle_atom_site_label_1 
 _geom_angle_atom_site_label_2 
 _geom_angle_atom_site_label_3 
 _geom_angle 
 _geom_angle_site_symmetry_1 
 _geom_angle_site_symmetry_3 
 _geom_angle_publ_flag 
O1 C1 N1 124.5(3) . . ? 
O1 C1 C2 125.1(3) . . ? 
N1 C1 C2 110.4(3) . . ? 
C3 C2 C7 120.3(3) . . ? 
C3 C2 C1 112.3(3) . . ? 
C7 C2 C1 127.5(3) . . ? 
C4 C3 C2 122.3(3) . . ? 
C4 C3 S1 128.8(3) . . ? 
C2 C3 S1 108.9(2) . . ? 
C3 C4 C5 116.7(3) . . ? 
C3 C4 H4 121.7 . . ? 
C5 C4 H4 121.7 . . ? 
C6 C5 C4 121.5(3) . . ? 
C6 C5 H5 119.2 . . ? 
C4 C5 H5 119.2 . . ? 
C5 C6 C7 121.5(3) . . ? 
C5 C6 H6 119.2 . . ? 
C7 C6 H6 119.2 . . ? 
C2 C7 C6 117.7(3) . . ? 
C2 C7 H7 121.2 . . ? 
C6 C7 H7 121.2 . . ? 
N2 C8 C9 121.8(4) . . ? 
N2 C8 H8 119.1 . . ? 
C9 C8 H8 119.1 . . ? 
C8 C9 C10 120.2(3) . . ? 
C8 C9 H9 119.9 . . ? 
C10 C9 H9 119.9 . . ? 
C11 C10 C9 117.0(3) . . ? 
C11 C10 C13 121.5(4) . . ? 
C9 C10 C13 121.5(3) . . ? 
C12 C11 C10 119.8(3) . . ? 
C12 C11 H11 120.1 . . ? 
C10 C11 H11 120.1 . . ? 
N2 C12 C11 122.5(3) . . ? 
N2 C12 H12 118.7 . . ? 
C11 C12 H12 118.7 . . ? 
C10 C13 H13A 109.5 . . ? 
C10 C13 H13B 109.5 . . ? 
H13A C13 H13B 109.5 . . ? 
C10 C13 H13C 109.5 . . ? 
H13A C13 H13C 109.5 . . ? 
H13B C13 H13C 109.5 . . ? 
C1 N1 S1 114.0(2) . . ? 
C1 N1 I1 121.0(2) . . ? 
S1 N1 I1 124.92(16) . . ? 
C12 N2 C8 118.7(3) . . ? 
C12 N2 I1 120.3(2) . . ? 
C8 N2 I1 121.1(2) . . ? 
O3 S1 O2 116.82(18) . . ? 
O3 S1 N1 111.04(17) . . ? 
O2 S1 N1 110.41(16) . . ? 
O3 S1 C3 111.15(16) . . ? 
O2 S1 C3 110.69(17) . . ? 
N1 S1 C3 94.53(16) . . ? 
N1 I1 N2 178.08(10) . . ? 
 
loop_ 
 _geom_torsion_atom_site_label_1 
 _geom_torsion_atom_site_label_2 
 _geom_torsion_atom_site_label_3 
 _geom_torsion_atom_site_label_4 
 _geom_torsion 
 _geom_torsion_site_symmetry_1 
 _geom_torsion_site_symmetry_2 
 _geom_torsion_site_symmetry_3 
 _geom_torsion_site_symmetry_4 
 _geom_torsion_publ_flag 
O1 C1 C2 C3 -179.8(3) . . . . ? 
N1 C1 C2 C3 -0.4(4) . . . . ? 
O1 C1 C2 C7 -0.8(6) . . . . ? 
N1 C1 C2 C7 178.6(3) . . . . ? 
C7 C2 C3 C4 0.5(5) . . . . ? 
C1 C2 C3 C4 179.6(3) . . . . ? 
C7 C2 C3 S1 -177.6(3) . . . . ? 
C1 C2 C3 S1 1.5(3) . . . . ? 
C2 C3 C4 C5 -1.1(5) . . . . ? 
S1 C3 C4 C5 176.6(3) . . . . ? 
C3 C4 C5 C6 0.7(5) . . . . ? 
C4 C5 C6 C7 0.3(6) . . . . ? 
C3 C2 C7 C6 0.5(5) . . . . ? 
C1 C2 C7 C6 -178.5(3) . . . . ? 
C5 C6 C7 C2 -0.9(5) . . . . ? 
N2 C8 C9 C10 -0.5(5) . . . . ? 
C8 C9 C10 C11 0.7(5) . . . . ? 
C8 C9 C10 C13 179.4(3) . . . . ? 
C9 C10 C11 C12 -0.4(5) . . . . ? 
C13 C10 C11 C12 -179.1(3) . . . . ? 
C10 C11 C12 N2 -0.1(5) . . . . ? 
O1 C1 N1 S1 178.4(3) . . . . ? 
C2 C1 N1 S1 -1.0(4) . . . . ? 
O1 C1 N1 I1 2.1(5) . . . . ? 
C2 C1 N1 I1 -177.3(2) . . . . ? 
C11 C12 N2 C8 0.4(5) . . . . ? 
C11 C12 N2 I1 178.7(3) . . . . ? 
C9 C8 N2 C12 -0.1(5) . . . . ? 
C9 C8 N2 I1 -178.4(3) . . . . ? 
C1 N1 S1 O3 116.3(3) . . . . ? 
I1 N1 S1 O3 -67.5(2) . . . . ? 
C1 N1 S1 O2 -112.4(3) . . . . ? 
I1 N1 S1 O2 63.7(2) . . . . ? 
C1 N1 S1 C3 1.6(3) . . . . ? 
I1 N1 S1 C3 177.73(19) . . . . ? 
C4 C3 S1 O3 65.6(4) . . . . ? 
C2 C3 S1 O3 -116.4(3) . . . . ? 
C4 C3 S1 O2 -65.9(4) . . . . ? 
C2 C3 S1 O2 112.0(3) . . . . ? 
C4 C3 S1 N1 -179.7(3) . . . . ? 
C2 C3 S1 N1 -1.8(3) . . . . ? 
C1 N1 I1 N2 -16(3) . . . . ? 
S1 N1 I1 N2 168(3) . . . . ? 
C12 N2 I1 N1 -146(3) . . . . ? 
C8 N2 I1 N1 32(3) . . . . ? 
 
_diffrn_measured_fraction_theta_max    0.996 
_diffrn_reflns_theta_full              27.47 
_diffrn_measured_fraction_theta_full   0.996 
_refine_diff_density_max    0.633 
_refine_diff_density_min   -0.752 
_refine_diff_density_rms    0.211 


#===END


 
data_NISac-DMAP-RT 
 
_audit_creation_method            SHELXL-97 
_chemical_name_systematic 
; 
 ? 
; 
_chemical_name_common 'N-iodosaccharin/4-dimethylaminopyridine'
_chemical_melting_point           ? 
_chemical_formula_moiety          
'C14 H14 I N3 O3 S' 
_chemical_formula_sum 
 'C14 H14 I N3 O3 S' 
_chemical_formula_weight          431.24 
 
loop_ 
 _atom_type_symbol 
 _atom_type_description 
 _atom_type_scat_dispersion_real 
 _atom_type_scat_dispersion_imag 
 _atom_type_scat_source 
 'C'  'C'   0.0033   0.0016 
 'International Tables Vol C Tables 4.2.6.8 and 6.1.1.4' 
 'H'  'H'   0.0000   0.0000 
 'International Tables Vol C Tables 4.2.6.8 and 6.1.1.4' 
 'N'  'N'   0.0061   0.0033 
 'International Tables Vol C Tables 4.2.6.8 and 6.1.1.4' 
 'O'  'O'   0.0106   0.0060 
 'International Tables Vol C Tables 4.2.6.8 and 6.1.1.4' 
 'S'  'S'   0.1246   0.1234 
 'International Tables Vol C Tables 4.2.6.8 and 6.1.1.4' 
 'I'  'I'  -0.4742   1.8119 
 'International Tables Vol C Tables 4.2.6.8 and 6.1.1.4' 
 
_symmetry_cell_setting            triclinic 
_symmetry_space_group_name_H-M    P-1
_symmetry_space_group_name_Hall   '-P 1' 

 
loop_ 
 _symmetry_equiv_pos_as_xyz 
 'x, y, z' 
 '-x, -y, -z' 
 
_cell_length_a                    7.7751(4) 
_cell_length_b                    8.2011(4) 
_cell_length_c                    13.0199(5) 
_cell_angle_alpha                 75.347(4) 
_cell_angle_beta                  88.101(5) 
_cell_angle_gamma                 83.128(5) 
_cell_volume                      797.43(6) 
_cell_formula_units_Z             2 
_cell_measurement_temperature     293(2) 
_cell_measurement_reflns_used     7325 
_cell_measurement_theta_min       3.54 
_cell_measurement_theta_max       27.49 
 
_exptl_crystal_description        prism 
_exptl_crystal_colour             colorless 
_exptl_crystal_size_max           0.23 
_exptl_crystal_size_mid           0.09 
_exptl_crystal_size_min           0.07 
_exptl_crystal_density_meas       ? 
_exptl_crystal_density_diffrn     1.796 
_exptl_crystal_density_method     'not measured' 
_exptl_crystal_F_000              424 
_exptl_absorpt_coefficient_mu     2.154 
_exptl_absorpt_correction_type                              multi-scan
_exptl_absorpt_process_details
;
  [Sheldrick, G.M. (2002). SADABS Bruker AXS Inc., Madison, Wisconsin, USA]
;
_exptl_absorpt_correction_T_min                      0.792
_exptl_absorpt_correction_T_max                      0.860

#----------------------------- Remark ------------------------------------#
# SADABS output:                                                          #
# Estimated minimum and maximum transmission:   0.5536  0.7456
#
# The ratio of these values is more reliable than their absolute values!  #
#-------------------------------------------------------------------------#

_diffrn_ambient_temperature       293(2) 
_diffrn_radiation_wavelength      0.71073
_diffrn_radiation_type            MoK\a
_diffrn_radiation_source          'fine-focus sealed tube'
_diffrn_measurement_device_type   'KappaCCD'
_diffrn_measurement_device        '95mm CCD camera on \k-goniostat'
_diffrn_detector_area_resol_mean  9
_diffrn_radiation_monochromator   'horizonally mounted graphite crystal'
_diffrn_measurement_method        'CCD'
_diffrn_standards_number          ? 
_diffrn_standards_interval_count  ? 
_diffrn_standards_interval_time   ? 
_diffrn_standards_decay_%         ? 
_diffrn_reflns_number             19447 
_diffrn_reflns_av_R_equivalents   0.0201 
_diffrn_reflns_av_sigmaI/netI     0.0142 
_diffrn_reflns_limit_h_min        -10 
_diffrn_reflns_limit_h_max        10 
_diffrn_reflns_limit_k_min        -9 
_diffrn_reflns_limit_k_max        10 
_diffrn_reflns_limit_l_min        -16 
_diffrn_reflns_limit_l_max        16 
_diffrn_reflns_theta_min          3.55 
_diffrn_reflns_theta_max          27.50 
_reflns_number_total              3646 
_reflns_number_gt                 3345 
_reflns_threshold_expression      >2sigma(I) 
 
_computing_data_collection        'Collect (Bruker AXS BV, 1997-2004)'
_computing_cell_refinement        'Dirax/lsq (Duisenberg & Schreurs, 1989-2000)'
_computing_data_reduction         'EvalCCD (Duisenberg & Schreurs 1990-2000)'
_computing_structure_solution     'SIR92 (Altomare et al., 1993)'
_computing_structure_refinement   'SHELXL-97 (Sheldrick, 1997)'
_computing_molecular_graphics     'Ortep-3 for Windows (Farrugia, 1997)'
_computing_publication_material   'WinGX publication routines (Farrugia, 1999)'
 
 
_refine_special_details 
; 
 Refinement of F^2^ against ALL reflections.  The weighted R-factor wR and 
 goodness of fit S are based on F^2^, conventional R-factors R are based 
 on F, with F set to zero for negative F^2^. The threshold expression of 
 F^2^ > 2sigma(F^2^) is used only for calculating R-factors(gt) etc. and is 
 not relevant to the choice of reflections for refinement.  R-factors based 
 on F^2^ are statistically about twice as large as those based on F, and R- 
 factors based on ALL data will be even larger. 
; 
 
_refine_ls_structure_factor_coef  Fsqd  
_refine_ls_matrix_type            full 
_refine_ls_weighting_scheme       calc  
_refine_ls_weighting_details 
 'calc w=1/[\s^2^(Fo^2^)+(0.0225P)^2^+0.3100P] where P=(Fo^2^+2Fc^2^)/3' 
_atom_sites_solution_primary      direct 
_atom_sites_solution_secondary    difmap 
_atom_sites_solution_hydrogens    geom 
_refine_ls_hydrogen_treatment     constr 
_refine_ls_extinction_method      none 
_refine_ls_extinction_coef        ? 
_refine_ls_number_reflns          3646 
_refine_ls_number_parameters      201 
_refine_ls_number_restraints      0 
_refine_ls_R_factor_all           0.0224 
_refine_ls_R_factor_gt            0.0184 
_refine_ls_wR_factor_ref          0.0459 
_refine_ls_wR_factor_gt           0.0440 
_refine_ls_goodness_of_fit_ref    1.088 
_refine_ls_restrained_S_all       1.088 
_refine_ls_shift/su_max           0.001 
_refine_ls_shift/su_mean          0.000 
 
loop_ 
 _atom_site_label 
 _atom_site_type_symbol 
 _atom_site_fract_x 
 _atom_site_fract_y 
 _atom_site_fract_z 
 _atom_site_U_iso_or_equiv 
 _atom_site_adp_type 
 _atom_site_occupancy 
 _atom_site_symmetry_multiplicity 
 _atom_site_calc_flag 
 _atom_site_refinement_flags 
 _atom_site_disorder_assembly 
 _atom_site_disorder_group 
C1 C 0.6064(2) -0.2732(2) 1.21171(14) 0.0359(4) Uani 1 1 d . . . 
C2 C 0.6158(2) -0.4287(2) 1.30232(14) 0.0339(4) Uani 1 1 d . . . 
C3 C 0.5416(3) -0.5767(3) 1.30846(17) 0.0443(4) Uani 1 1 d . . . 
H013 H 0.4737 -0.5871 1.2535 0.053 Uiso 1 1 calc R . . 
C4 C 0.5717(3) -0.7083(3) 1.39890(19) 0.0513(5) Uani 1 1 d . . . 
H021 H 0.5240 -0.8089 1.4044 0.062 Uiso 1 1 calc R . . 
C5 C 0.6712(3) -0.6926(3) 1.48096(19) 0.0528(5) Uani 1 1 d . . . 
H022 H 0.6889 -0.7828 1.5408 0.063 Uiso 1 1 calc R . . 
C6 C 0.7454(3) -0.5448(3) 1.47604(16) 0.0447(5) Uani 1 1 d . . . 
H018 H 0.8123 -0.5336 1.5313 0.054 Uiso 1 1 calc R . . 
C7 C 0.7150(2) -0.4154(2) 1.38499(14) 0.0337(4) Uani 1 1 d . . . 
C8 C 0.8841(3) 0.3341(3) 0.90080(17) 0.0451(5) Uani 1 1 d . . . 
H012 H 0.9322 0.2322 0.8872 0.054 Uiso 1 1 calc R . . 
C9 C 0.9028(3) 0.4813(3) 0.82642(16) 0.0433(4) Uani 1 1 d . . . 
H011 H 0.9646 0.4779 0.7645 0.052 Uiso 1 1 calc R . . 
C10 C 0.8293(2) 0.6392(2) 0.84241(14) 0.0350(4) Uani 1 1 d . . . 
C11 C 0.7395(3) 0.6309(2) 0.93997(15) 0.0404(4) Uani 1 1 d . . . 
H1 H 0.6881 0.7299 0.9560 0.048 Uiso 1 1 calc R . . 
C12 C 0.7285(3) 0.4783(3) 1.01010(15) 0.0424(4) Uani 1 1 d . . . 
H015 H 0.6689 0.4766 1.0734 0.051 Uiso 1 1 calc R . . 
C13 C 0.9335(4) 0.7932(3) 0.67037(19) 0.0609(6) Uani 1 1 d . . . 
H01A H 1.0463 0.7306 0.6847 0.091 Uiso 1 1 calc R . . 
H01B H 0.9454 0.9091 0.6350 0.091 Uiso 1 1 calc R . . 
H01C H 0.8704 0.7442 0.6258 0.091 Uiso 1 1 calc R . . 
C14 C 0.7530(3) 0.9463(3) 0.7853(2) 0.0581(6) Uani 1 1 d . . . 
H02A H 0.6322 0.9552 0.7690 0.087 Uiso 1 1 calc R . . 
H02B H 0.8039 1.0391 0.7393 0.087 Uiso 1 1 calc R . . 
H02C H 0.7657 0.9498 0.8578 0.087 Uiso 1 1 calc R . . 
N1 N 0.7023(2) -0.1554(2) 1.23305(12) 0.0399(4) Uani 1 1 d . . . 
N2 N 0.7993(2) 0.3296(2) 0.99290(13) 0.0391(3) Uani 1 1 d . . . 
N3 N 0.8400(2) 0.7865(2) 0.76999(14) 0.0442(4) Uani 1 1 d . . . 
O1 O 0.5262(2) -0.2544(2) 1.13023(11) 0.0515(4) Uani 1 1 d . . . 
O2 O 0.7172(3) -0.1097(2) 1.41765(13) 0.0585(4) Uani 1 1 d . . . 
O3 O 0.9768(2) -0.2316(2) 1.34157(13) 0.0545(4) Uani 1 1 d . . . 
S002 S 0.79131(6) -0.21401(6) 1.35065(4) 0.03619(10) Uani 1 1 d . . . 
I1 I 0.753504(16) 0.089044(15) 1.110457(9) 0.03820(5) Uani 1 1 d . . . 
 
loop_ 
 _atom_site_aniso_label 
 _atom_site_aniso_U_11 
 _atom_site_aniso_U_22 
 _atom_site_aniso_U_33 
 _atom_site_aniso_U_23 
 _atom_site_aniso_U_13 
 _atom_site_aniso_U_12 
C1 0.0379(9) 0.0352(9) 0.0318(9) -0.0047(7) 0.0001(7) -0.0004(8) 
C2 0.0350(9) 0.0324(9) 0.0322(8) -0.0059(7) 0.0029(7) -0.0011(7) 
C3 0.0461(11) 0.0413(10) 0.0478(11) -0.0133(9) 0.0043(9) -0.0104(9) 
C4 0.0556(13) 0.0318(10) 0.0638(14) -0.0058(9) 0.0141(11) -0.0112(9) 
C5 0.0573(13) 0.0375(11) 0.0507(12) 0.0083(9) 0.0092(10) 0.0011(10) 
C6 0.0493(11) 0.0403(10) 0.0368(10) 0.0023(8) -0.0018(8) 0.0002(9) 
C7 0.0365(9) 0.0295(8) 0.0317(8) -0.0034(7) 0.0012(7) 0.0002(7) 
C8 0.0492(12) 0.0364(10) 0.0473(11) -0.0083(8) 0.0057(9) -0.0020(9) 
C9 0.0458(11) 0.0420(10) 0.0405(10) -0.0089(8) 0.0091(8) -0.0038(9) 
C10 0.0322(9) 0.0364(9) 0.0351(9) -0.0047(7) -0.0014(7) -0.0073(7) 
C11 0.0460(11) 0.0343(9) 0.0394(10) -0.0076(8) 0.0073(8) -0.0044(8) 
C12 0.0505(11) 0.0408(10) 0.0340(9) -0.0058(8) 0.0058(8) -0.0073(9) 
C13 0.0799(18) 0.0547(13) 0.0431(12) -0.0017(10) 0.0166(11) -0.0153(13) 
C14 0.0576(14) 0.0370(11) 0.0701(15) 0.0013(10) 0.0129(12) -0.0033(10) 
N1 0.0503(9) 0.0324(8) 0.0320(8) 0.0030(6) -0.0072(7) -0.0067(7) 
N2 0.0419(9) 0.0335(8) 0.0383(8) -0.0012(6) -0.0013(7) -0.0059(7) 
N3 0.0477(10) 0.0382(9) 0.0418(9) -0.0005(7) 0.0075(7) -0.0084(7) 
O1 0.0610(9) 0.0551(9) 0.0362(7) -0.0054(6) -0.0137(7) -0.0072(7) 
O2 0.0895(13) 0.0411(8) 0.0483(8) -0.0176(7) 0.0032(8) -0.0084(8) 
O3 0.0438(8) 0.0534(9) 0.0606(9) 0.0007(7) -0.0112(7) -0.0126(7) 
S002 0.0444(3) 0.0301(2) 0.0318(2) -0.00242(17) -0.00506(18) -0.00513(18) 
I1 0.03918(7) 0.03354(7) 0.03700(7) -0.00032(5) -0.00362(5) -0.00219(5) 
 
_geom_special_details 
; 
 All esds (except the esd in the dihedral angle between two l.s. planes) 
 are estimated using the full covariance matrix.  The cell esds are taken 
 into account individually in the estimation of esds in distances, angles 
 and torsion angles; correlations between esds in cell parameters are only 
 used when they are defined by crystal symmetry.  An approximate (isotropic) 
 treatment of cell esds is used for estimating esds involving l.s. planes. 
; 
 
loop_ 
 _geom_bond_atom_site_label_1 
 _geom_bond_atom_site_label_2 
 _geom_bond_distance 
 _geom_bond_site_symmetry_2 
 _geom_bond_publ_flag 
C1 O1 1.215(2) . ? 
C1 N1 1.374(3) . ? 
C1 C2 1.499(2) . ? 
C2 C7 1.378(3) . ? 
C2 C3 1.388(3) . ? 
C3 C4 1.386(3) . ? 
C3 H013 0.9300 . ? 
C4 C5 1.380(4) . ? 
C4 H021 0.9300 . ? 
C5 C6 1.390(3) . ? 
C5 H022 0.9300 . ? 
C6 C7 1.382(3) . ? 
C6 H018 0.9300 . ? 
C7 S002 1.7671(18) . ? 
C8 N2 1.344(3) . ? 
C8 C9 1.363(3) . ? 
C8 H012 0.9300 . ? 
C9 C10 1.413(3) . ? 
C9 H011 0.9300 . ? 
C10 N3 1.341(2) . ? 
C10 C11 1.419(3) . ? 
C11 C12 1.360(3) . ? 
C11 H1 0.9300 . ? 
C12 N2 1.345(3) . ? 
C12 H015 0.9300 . ? 
C13 N3 1.458(3) . ? 
C13 H01A 0.9600 . ? 
C13 H01B 0.9600 . ? 
C13 H01C 0.9600 . ? 
C14 N3 1.458(3) . ? 
C14 H02A 0.9600 . ? 
C14 H02B 0.9600 . ? 
C14 H02C 0.9600 . ? 
N1 S002 1.6350(16) . ? 
N1 I1 2.2925(15) . ? 
N2 I1 2.2285(16) . ? 
O2 S002 1.4324(16) . ? 
O3 S002 1.4360(16) . ? 
 
loop_ 
 _geom_angle_atom_site_label_1 
 _geom_angle_atom_site_label_2 
 _geom_angle_atom_site_label_3 
 _geom_angle 
 _geom_angle_site_symmetry_1 
 _geom_angle_site_symmetry_3 
 _geom_angle_publ_flag 
O1 C1 N1 124.64(18) . . ? 
O1 C1 C2 124.69(18) . . ? 
N1 C1 C2 110.66(15) . . ? 
C7 C2 C3 120.04(18) . . ? 
C7 C2 C1 112.43(16) . . ? 
C3 C2 C1 127.51(18) . . ? 
C4 C3 C2 118.1(2) . . ? 
C4 C3 H013 121.0 . . ? 
C2 C3 H013 121.0 . . ? 
C5 C4 C3 121.1(2) . . ? 
C5 C4 H021 119.5 . . ? 
C3 C4 H021 119.5 . . ? 
C4 C5 C6 121.4(2) . . ? 
C4 C5 H022 119.3 . . ? 
C6 C5 H022 119.3 . . ? 
C7 C6 C5 116.6(2) . . ? 
C7 C6 H018 121.7 . . ? 
C5 C6 H018 121.7 . . ? 
C2 C7 C6 122.74(18) . . ? 
C2 C7 S002 108.29(13) . . ? 
C6 C7 S002 128.96(16) . . ? 
N2 C8 C9 122.89(19) . . ? 
N2 C8 H012 118.6 . . ? 
C9 C8 H012 118.6 . . ? 
C8 C9 C10 120.73(18) . . ? 
C8 C9 H011 119.6 . . ? 
C10 C9 H011 119.6 . . ? 
N3 C10 C9 122.68(18) . . ? 
N3 C10 C11 122.05(18) . . ? 
C9 C10 C11 115.25(17) . . ? 
C12 C11 C10 120.06(18) . . ? 
C12 C11 H1 120.0 . . ? 
C10 C11 H1 120.0 . . ? 
N2 C12 C11 123.57(18) . . ? 
N2 C12 H015 118.2 . . ? 
C11 C12 H015 118.2 . . ? 
N3 C13 H01A 109.5 . . ? 
N3 C13 H01B 109.5 . . ? 
H01A C13 H01B 109.5 . . ? 
N3 C13 H01C 109.5 . . ? 
H01A C13 H01C 109.5 . . ? 
H01B C13 H01C 109.5 . . ? 
N3 C14 H02A 109.5 . . ? 
N3 C14 H02B 109.5 . . ? 
H02A C14 H02B 109.5 . . ? 
N3 C14 H02C 109.5 . . ? 
H02A C14 H02C 109.5 . . ? 
H02B C14 H02C 109.5 . . ? 
C1 N1 S002 113.59(12) . . ? 
C1 N1 I1 123.32(12) . . ? 
S002 N1 I1 122.87(9) . . ? 
C8 N2 C12 117.49(17) . . ? 
C8 N2 I1 123.18(14) . . ? 
C12 N2 I1 119.14(13) . . ? 
C10 N3 C13 121.46(19) . . ? 
C10 N3 C14 121.58(18) . . ? 
C13 N3 C14 116.92(18) . . ? 
O2 S002 O3 116.38(11) . . ? 
O2 S002 N1 111.16(10) . . ? 
O3 S002 N1 110.46(10) . . ? 
O2 S002 C7 111.35(10) . . ? 
O3 S002 C7 110.50(9) . . ? 
N1 S002 C7 94.98(8) . . ? 
N2 I1 N1 178.84(6) . . ? 
 
loop_ 
 _geom_torsion_atom_site_label_1 
 _geom_torsion_atom_site_label_2 
 _geom_torsion_atom_site_label_3 
 _geom_torsion_atom_site_label_4 
 _geom_torsion 
 _geom_torsion_site_symmetry_1 
 _geom_torsion_site_symmetry_2 
 _geom_torsion_site_symmetry_3 
 _geom_torsion_site_symmetry_4 
 _geom_torsion_publ_flag 
O1 C1 C2 C7 -179.63(19) . . . . ? 
N1 C1 C2 C7 0.9(2) . . . . ? 
O1 C1 C2 C3 2.0(3) . . . . ? 
N1 C1 C2 C3 -177.44(19) . . . . ? 
C7 C2 C3 C4 -0.5(3) . . . . ? 
C1 C2 C3 C4 177.79(19) . . . . ? 
C2 C3 C4 C5 0.5(3) . . . . ? 
C3 C4 C5 C6 -0.2(4) . . . . ? 
C4 C5 C6 C7 -0.2(3) . . . . ? 
C3 C2 C7 C6 0.0(3) . . . . ? 
C1 C2 C7 C6 -178.45(18) . . . . ? 
C3 C2 C7 S002 179.15(15) . . . . ? 
C1 C2 C7 S002 0.7(2) . . . . ? 
C5 C6 C7 C2 0.3(3) . . . . ? 
C5 C6 C7 S002 -178.62(16) . . . . ? 
N2 C8 C9 C10 -1.2(3) . . . . ? 
C8 C9 C10 N3 -177.9(2) . . . . ? 
C8 C9 C10 C11 0.8(3) . . . . ? 
N3 C10 C11 C12 178.49(19) . . . . ? 
C9 C10 C11 C12 -0.2(3) . . . . ? 
C10 C11 C12 N2 0.0(3) . . . . ? 
O1 C1 N1 S002 178.33(17) . . . . ? 
C2 C1 N1 S002 -2.2(2) . . . . ? 
O1 C1 N1 I1 -7.0(3) . . . . ? 
C2 C1 N1 I1 172.48(12) . . . . ? 
C9 C8 N2 C12 1.0(3) . . . . ? 
C9 C8 N2 I1 176.00(17) . . . . ? 
C11 C12 N2 C8 -0.4(3) . . . . ? 
C11 C12 N2 I1 -175.62(17) . . . . ? 
C9 C10 N3 C13 -1.7(3) . . . . ? 
C11 C10 N3 C13 179.6(2) . . . . ? 
C9 C10 N3 C14 175.8(2) . . . . ? 
C11 C10 N3 C14 -2.8(3) . . . . ? 
C1 N1 S002 O2 -112.89(16) . . . . ? 
I1 N1 S002 O2 72.38(14) . . . . ? 
C1 N1 S002 O3 116.35(15) . . . . ? 
I1 N1 S002 O3 -58.38(14) . . . . ? 
C1 N1 S002 C7 2.29(16) . . . . ? 
I1 N1 S002 C7 -172.44(11) . . . . ? 
C2 C7 S002 O2 113.37(15) . . . . ? 
C6 C7 S002 O2 -67.6(2) . . . . ? 
C2 C7 S002 O3 -115.68(14) . . . . ? 
C6 C7 S002 O3 63.4(2) . . . . ? 
C2 C7 S002 N1 -1.66(15) . . . . ? 
C6 C7 S002 N1 177.4(2) . . . . ? 
C8 N2 I1 N1 -165(3) . . . . ? 
C12 N2 I1 N1 10(3) . . . . ? 
C1 N1 I1 N2 103(3) . . . . ? 
S002 N1 I1 N2 -83(3) . . . . ? 
 
_diffrn_measured_fraction_theta_max    0.997 
_diffrn_reflns_theta_full              27.50 
_diffrn_measured_fraction_theta_full   0.997 
_refine_diff_density_max    0.298 
_refine_diff_density_min   -0.453 
_refine_diff_density_rms    0.054 


#===END


 
data_NISac-DMAP_150K
 
_audit_creation_method            SHELXL-97
_chemical_name_systematic
;
 ?
;
_chemical_name_common 'N-iodosaccharin/4-dimethylaminopyridine'
_chemical_melting_point           ?
_chemical_formula_moiety          'C14 H14 I N3 O3 S'
_chemical_formula_sum
 'C14 H14 I N3 O3 S'
_chemical_formula_weight          431.25
_chemical_absolute_configuration  syn
 
loop_
 _atom_type_symbol
 _atom_type_description
 _atom_type_scat_dispersion_real
 _atom_type_scat_dispersion_imag
 _atom_type_scat_source
 'C'  'C'   0.0033   0.0016
 'International Tables Vol C Tables 4.2.6.8 and 6.1.1.4'
 'H'  'H'   0.0000   0.0000
 'International Tables Vol C Tables 4.2.6.8 and 6.1.1.4'
 'N'  'N'   0.0061   0.0033
 'International Tables Vol C Tables 4.2.6.8 and 6.1.1.4'
 'O'  'O'   0.0106   0.0060
 'International Tables Vol C Tables 4.2.6.8 and 6.1.1.4'
 'S'  'S'   0.1246   0.1234
 'International Tables Vol C Tables 4.2.6.8 and 6.1.1.4'
 'I'  'I'  -0.4742   1.8119
 'International Tables Vol C Tables 4.2.6.8 and 6.1.1.4'
 
_symmetry_cell_setting            triclinic
_symmetry_space_group_name_H-M    'P-1'
_symmetry_space_group_name_Hall   '-P 1'

 
loop_
 _symmetry_equiv_pos_as_xyz
 'x, y, z'
 '-x, -y, -z'
 
_cell_length_a                    7.724(5)
_cell_length_b                    8.116(5)
_cell_length_c                    12.862(5)
_cell_angle_alpha                 76.081(5)
_cell_angle_beta                  88.161(5)
_cell_angle_gamma                 83.352(5)
_cell_volume                      777.3(8)
_cell_formula_units_Z             2
_cell_measurement_temperature     150(2)
_cell_measurement_reflns_used     6549
_cell_measurement_theta_min       2.60
_cell_measurement_theta_max       27.37
 
_exptl_crystal_description        prism
_exptl_crystal_colour             colorless
_exptl_crystal_size_max           0.23
_exptl_crystal_size_mid           0.16
_exptl_crystal_size_min           0.09
_exptl_crystal_density_meas       ?
_exptl_crystal_density_diffrn     1.842
_exptl_crystal_density_method     'not measured'
_exptl_crystal_F_000              424
_exptl_absorpt_coefficient_mu     2.209
_exptl_absorpt_correction_type    multi-scan
_exptl_absorpt_process_details
;
  [Sheldrick, G.M. (2002). SADABS Bruker AXS Inc., Madison, Wisconsin, USA]
;
_exptl_absorpt_correction_T_min                      0.661
_exptl_absorpt_correction_T_max                      0.820

#------------------------------- Remark -------------------------------------#
# SADABS output:                                                             #
# Estimated minimum and maximum transmission:  0.6612  0.7456                #
# The ratio of these values is more reliable than their absolute values!     #
#----------------------------------------------------------------------------#

 
 
_diffrn_ambient_temperature       150(2)
_diffrn_radiation_wavelength      0.71073
_diffrn_radiation_type            MoK\a
_diffrn_radiation_source          'fine-focus sealed tube'
_diffrn_radiation_monochromator   graphite
_diffrn_measurement_device_type    'APEXII, Bruker-AXS'
_diffrn_measurement_method         'CCD rotation images, thin slices'
_diffrn_detector                   'CCD plate'
_diffrn_standards_number          ?
_diffrn_standards_interval_count  ?
_diffrn_standards_interval_time   ?
_diffrn_standards_decay_%         ?
_diffrn_reflns_number             6147
_diffrn_reflns_av_R_equivalents   0.0214
_diffrn_reflns_av_sigmaI/netI     0.0392
_diffrn_reflns_limit_h_min        -10
_diffrn_reflns_limit_h_max        9
_diffrn_reflns_limit_k_min        -10
_diffrn_reflns_limit_k_max        10
_diffrn_reflns_limit_l_min        -16
_diffrn_reflns_limit_l_max        15
_diffrn_reflns_theta_min          1.63
_diffrn_reflns_theta_max          27.45
_reflns_number_total              3530
_reflns_number_gt                 3361
_reflns_threshold_expression      >2sigma(I)
 
_computing_data_collection       'Bruker SAINT'
_computing_cell_refinement       'Bruker SMART'
_computing_data_reduction        'Bruker SAINT'
_computing_structure_solution    'SIR97 (Altomare et al., 1999)'
_computing_structure_refinement  'SHELXL-97 (Sheldrick, 1997)'
_computing_molecular_graphics    'Ortep-3 for Windows (Farrugia, 1997)'
_computing_publication_material  'WinGX publication routines (Farrugia, 1999)'
 
_refine_special_details
;
 Refinement of F^2^ against ALL reflections.  The weighted R-factor wR and
 goodness of fit S are based on F^2^, conventional R-factors R are based
 on F, with F set to zero for negative F^2^. The threshold expression of
 F^2^ > 2sigma(F^2^) is used only for calculating R-factors(gt) etc. and is
 not relevant to the choice of reflections for refinement.  R-factors based
 on F^2^ are statistically about twice as large as those based on F, and R-
 factors based on ALL data will be even larger.
;
 
_refine_ls_structure_factor_coef  Fsqd
_refine_ls_matrix_type            full
_refine_ls_weighting_scheme       calc
_refine_ls_weighting_details
 'calc w=1/[\s^2^(Fo^2^)+(0.0494P)^2^+0.7346P] where P=(Fo^2^+2Fc^2^)/3'
_atom_sites_solution_primary      direct
_atom_sites_solution_secondary    difmap
_atom_sites_solution_hydrogens    geom
_refine_ls_hydrogen_treatment     mixed
_refine_ls_extinction_method      none
_refine_ls_extinction_coef        ?
_refine_ls_number_reflns          3530
_refine_ls_number_parameters      199
_refine_ls_number_restraints      0
_refine_ls_R_factor_all           0.0225
_refine_ls_R_factor_gt            0.0207
_refine_ls_wR_factor_ref          0.0695
_refine_ls_wR_factor_gt           0.0561
_refine_ls_goodness_of_fit_ref    0.872
_refine_ls_restrained_S_all       0.872
_refine_ls_shift/su_max           0.001
_refine_ls_shift/su_mean          0.000
 
loop_
 _atom_site_label
 _atom_site_type_symbol
 _atom_site_fract_x
 _atom_site_fract_y
 _atom_site_fract_z
 _atom_site_U_iso_or_equiv
 _atom_site_adp_type
 _atom_site_occupancy
 _atom_site_symmetry_multiplicity
 _atom_site_calc_flag
 _atom_site_refinement_flags
 _atom_site_disorder_assembly
 _atom_site_disorder_group
I1 I 0.747302(19) -0.088998(18) 0.388675(11) 0.01866(7) Uani 1 1 d . . .
S1 S 0.70904(8) 0.21520(8) 0.14713(5) 0.01774(13) Uani 1 1 d . . .
O1 O 0.9821(3) 0.2549(2) 0.36894(15) 0.0254(4) Uani 1 1 d . . .
C1 C 0.7865(3) 0.4180(3) 0.1134(2) 0.0181(5) Uani 1 1 d . . .
O2 O 0.5220(3) 0.2330(3) 0.15737(16) 0.0268(4) Uani 1 1 d . . .
O3 O 0.7810(3) 0.1095(2) 0.07768(16) 0.0287(4) Uani 1 1 d . . .
C14 C 0.7455(4) -0.9493(3) 0.7129(3) 0.0295(6) Uani 1 1 d . . .
H14A H 0.7207 -1.0406 0.7724 0.044 Uiso 1 1 calc R . .
H14B H 0.8688 -0.9419 0.7087 0.044 Uiso 1 1 calc R . .
H14C H 0.7067 -0.9710 0.6478 0.044 Uiso 1 1 calc R . .
N1 N 0.8004(3) 0.1553(3) 0.26524(17) 0.0209(4) Uani 1 1 d . . .
N3 N 0.6549(3) -0.7887(3) 0.72794(18) 0.0223(4) Uani 1 1 d . . .
N2 N 0.7006(3) -0.3292(3) 0.50593(18) 0.0197(4) Uani 1 1 d . . .
C6 C 0.8888(3) 0.4307(3) 0.19702(19) 0.0177(5) Uani 1 1 d . . .
C9 C 0.7627(3) -0.6330(3) 0.5585(2) 0.0208(5) Uani 1 1 d . . .
H9 H 0.8162 -0.7327 0.5425 0.025 Uiso 1 1 calc R . .
C10 C 0.6121(4) -0.3335(3) 0.5986(2) 0.0227(5) Uani 1 1 d . . .
H10 H 0.5619 -0.2310 0.6123 0.027 Uiso 1 1 calc R . .
C12 C 0.6685(3) -0.6411(3) 0.6562(2) 0.0181(5) Uani 1 1 d . . .
C2 C 0.7554(4) 0.5487(3) 0.0225(2) 0.0228(5) Uani 1 1 d . . .
H2 H 0.6867 0.5377 -0.0330 0.027 Uiso 1 1 calc R . .
C4 C 0.9344(4) 0.7125(3) 0.1013(2) 0.0251(6) Uani 1 1 d . . .
H4 H 0.9837 0.8135 0.0963 0.030 Uiso 1 1 calc R . .
C7 C 0.8991(3) 0.2742(3) 0.28723(19) 0.0185(5) Uani 1 1 d . . .
C3 C 0.8315(4) 0.6974(3) 0.0179(2) 0.0256(6) Uani 1 1 d . . .
H3 H 0.8134 0.7882 -0.0419 0.031 Uiso 1 1 calc R . .
C8 C 0.7744(4) -0.4790(3) 0.4883(2) 0.0212(5) Uani 1 1 d . . .
H8 H 0.8367 -0.4773 0.4250 0.025 Uiso 1 1 calc R . .
C11 C 0.5929(4) -0.4815(3) 0.6731(2) 0.0220(5) Uani 1 1 d . . .
H11 H 0.5299 -0.4779 0.7355 0.026 Uiso 1 1 calc R . .
C5 C 0.9649(4) 0.5795(3) 0.1917(2) 0.0221(5) Uani 1 1 d . . .
H5 H 1.0342 0.5898 0.2472 0.026 Uiso 1 1 calc R . .
C13 C 0.5592(4) -0.7930(4) 0.8284(2) 0.0299(6) Uani 1 1 d . . .
H13A H 0.5633 -0.9088 0.8697 0.045 Uiso 1 1 calc R . .
H13B H 0.4400 -0.7470 0.8130 0.045 Uiso 1 1 calc R . .
H13C H 0.6113 -0.7259 0.8683 0.045 Uiso 1 1 calc R . .
 
loop_
 _atom_site_aniso_label
 _atom_site_aniso_U_11
 _atom_site_aniso_U_22
 _atom_site_aniso_U_33
 _atom_site_aniso_U_23
 _atom_site_aniso_U_13
 _atom_site_aniso_U_12
I1 0.01947(10) 0.01627(10) 0.01813(10) -0.00020(6) -0.00185(6) -0.00105(6)
S1 0.0211(3) 0.0150(3) 0.0157(3) -0.0009(2) -0.0022(2) -0.0016(2)
O1 0.0291(10) 0.0268(10) 0.0190(9) -0.0027(8) -0.0066(8) -0.0020(8)
C1 0.0199(12) 0.0166(11) 0.0168(11) -0.0031(9) 0.0026(9) -0.0014(9)
O2 0.0217(10) 0.0264(10) 0.0297(10) -0.0005(8) -0.0053(8) -0.0044(8)
O3 0.0413(12) 0.0222(10) 0.0242(9) -0.0087(8) 0.0027(8) -0.0035(8)
C14 0.0299(15) 0.0178(12) 0.0363(15) 0.0005(11) 0.0078(12) -0.0017(11)
N1 0.0247(11) 0.0192(10) 0.0161(10) 0.0020(8) -0.0040(8) -0.0034(9)
N3 0.0241(11) 0.0195(10) 0.0215(11) -0.0013(9) 0.0047(9) -0.0040(9)
N2 0.0205(11) 0.0168(10) 0.0202(10) -0.0007(8) -0.0011(8) -0.0028(8)
C6 0.0176(11) 0.0176(11) 0.0166(11) -0.0026(9) 0.0020(9) -0.0007(9)
C9 0.0229(13) 0.0181(12) 0.0215(12) -0.0054(10) 0.0035(10) -0.0025(9)
C10 0.0234(13) 0.0193(12) 0.0250(13) -0.0055(10) 0.0010(10) -0.0009(10)
C12 0.0172(11) 0.0187(11) 0.0181(11) -0.0029(9) -0.0018(9) -0.0036(9)
C2 0.0248(13) 0.0223(12) 0.0182(11) -0.0008(10) 0.0004(10) 0.0013(10)
C4 0.0244(13) 0.0176(12) 0.0317(14) -0.0035(11) 0.0084(11) -0.0031(10)
C7 0.0188(11) 0.0171(11) 0.0183(11) -0.0032(9) 0.0012(9) 0.0004(9)
C3 0.0295(14) 0.0190(12) 0.0227(13) 0.0039(10) 0.0057(11) 0.0000(10)
C8 0.0238(12) 0.0209(12) 0.0186(11) -0.0037(10) 0.0033(10) -0.0044(10)
C11 0.0232(13) 0.0224(12) 0.0203(12) -0.0054(10) 0.0049(10) -0.0027(10)
C5 0.0229(13) 0.0214(12) 0.0229(12) -0.0069(10) 0.0037(10) -0.0043(10)
C13 0.0370(16) 0.0302(15) 0.0212(13) -0.0027(11) 0.0080(11) -0.0073(12)
 
_geom_special_details
;
 All esds (except the esd in the dihedral angle between two l.s. planes)
 are estimated using the full covariance matrix.  The cell esds are taken
 into account individually in the estimation of esds in distances, angles
 and torsion angles; correlations between esds in cell parameters are only
 used when they are defined by crystal symmetry.  An approximate (isotropic)
 treatment of cell esds is used for estimating esds involving l.s. planes.
;
 
loop_
 _geom_bond_atom_site_label_1
 _geom_bond_atom_site_label_2
 _geom_bond_distance
 _geom_bond_site_symmetry_2
 _geom_bond_publ_flag
I1 N2 2.218(2) . ?
I1 N1 2.292(2) . ?
S1 O3 1.438(2) . ?
S1 O2 1.440(2) . ?
S1 N1 1.636(2) . ?
S1 C1 1.767(3) . ?
O1 C7 1.217(3) . ?
C1 C2 1.383(4) . ?
C1 C6 1.385(4) . ?
C14 N3 1.458(4) . ?
C14 H14A 0.9600 . ?
C14 H14B 0.9600 . ?
C14 H14C 0.9600 . ?
N1 C7 1.381(3) . ?
N3 C12 1.338(3) . ?
N3 C13 1.463(3) . ?
N2 C8 1.349(3) . ?
N2 C10 1.350(3) . ?
C6 C5 1.390(4) . ?
C6 C7 1.496(3) . ?
C9 C8 1.365(4) . ?
C9 C12 1.423(3) . ?
C9 H9 0.9300 . ?
C10 C11 1.364(4) . ?
C10 H10 0.9300 . ?
C12 C11 1.420(4) . ?
C2 C3 1.390(4) . ?
C2 H2 0.9300 . ?
C4 C5 1.389(4) . ?
C4 C3 1.392(4) . ?
C4 H4 0.9300 . ?
C3 H3 0.9300 . ?
C8 H8 0.9300 . ?
C11 H11 0.9300 . ?
C5 H5 0.9300 . ?
C13 H13A 0.9600 . ?
C13 H13B 0.9600 . ?
C13 H13C 0.9600 . ?
 
loop_
 _geom_angle_atom_site_label_1
 _geom_angle_atom_site_label_2
 _geom_angle_atom_site_label_3
 _geom_angle
 _geom_angle_site_symmetry_1
 _geom_angle_site_symmetry_3
 _geom_angle_publ_flag
N2 I1 N1 178.56(7) . . ?
O3 S1 O2 115.95(13) . . ?
O3 S1 N1 111.22(13) . . ?
O2 S1 N1 110.54(12) . . ?
O3 S1 C1 111.55(12) . . ?
O2 S1 C1 110.46(12) . . ?
N1 S1 C1 95.24(12) . . ?
C2 C1 C6 122.7(2) . . ?
C2 C1 S1 129.2(2) . . ?
C6 C1 S1 108.06(18) . . ?
N3 C14 H14A 109.5 . . ?
N3 C14 H14B 109.5 . . ?
H14A C14 H14B 109.5 . . ?
N3 C14 H14C 109.5 . . ?
H14A C14 H14C 109.5 . . ?
H14B C14 H14C 109.5 . . ?
C7 N1 S1 113.42(17) . . ?
C7 N1 I1 123.11(17) . . ?
S1 N1 I1 123.20(12) . . ?
C12 N3 C13 121.0(2) . . ?
C12 N3 C14 121.4(2) . . ?
C13 N3 C14 117.4(2) . . ?
C8 N2 C10 117.6(2) . . ?
C8 N2 I1 118.78(17) . . ?
C10 N2 I1 123.43(18) . . ?
C1 C6 C5 120.0(2) . . ?
C1 C6 C7 112.6(2) . . ?
C5 C6 C7 127.4(2) . . ?
C8 C9 C12 120.0(2) . . ?
C8 C9 H9 120.0 . . ?
C12 C9 H9 120.0 . . ?
N2 C10 C11 123.0(2) . . ?
N2 C10 H10 118.5 . . ?
C11 C10 H10 118.5 . . ?
N3 C12 C11 122.4(2) . . ?
N3 C12 C9 122.2(2) . . ?
C11 C12 C9 115.4(2) . . ?
C1 C2 C3 116.9(3) . . ?
C1 C2 H2 121.5 . . ?
C3 C2 H2 121.5 . . ?
C5 C4 C3 121.1(3) . . ?
C5 C4 H4 119.4 . . ?
C3 C4 H4 119.4 . . ?
O1 C7 N1 124.7(2) . . ?
O1 C7 C6 124.6(2) . . ?
N1 C7 C6 110.6(2) . . ?
C4 C3 C2 121.1(2) . . ?
C4 C3 H3 119.4 . . ?
C2 C3 H3 119.4 . . ?
N2 C8 C9 123.4(2) . . ?
N2 C8 H8 118.3 . . ?
C9 C8 H8 118.3 . . ?
C10 C11 C12 120.6(2) . . ?
C10 C11 H11 119.7 . . ?
C12 C11 H11 119.7 . . ?
C4 C5 C6 118.1(3) . . ?
C4 C5 H5 121.0 . . ?
C6 C5 H5 121.0 . . ?
N3 C13 H13A 109.5 . . ?
N3 C13 H13B 109.5 . . ?
H13A C13 H13B 109.5 . . ?
N3 C13 H13C 109.5 . . ?
H13A C13 H13C 109.5 . . ?
H13B C13 H13C 109.5 . . ?
 
loop_
 _geom_torsion_atom_site_label_1
 _geom_torsion_atom_site_label_2
 _geom_torsion_atom_site_label_3
 _geom_torsion_atom_site_label_4
 _geom_torsion
 _geom_torsion_site_symmetry_1
 _geom_torsion_site_symmetry_2
 _geom_torsion_site_symmetry_3
 _geom_torsion_site_symmetry_4
 _geom_torsion_publ_flag
O3 S1 C1 C2 67.3(3) . . . . ?
O2 S1 C1 C2 -63.2(3) . . . . ?
N1 S1 C1 C2 -177.5(3) . . . . ?
O3 S1 C1 C6 -113.50(19) . . . . ?
O2 S1 C1 C6 116.00(19) . . . . ?
N1 S1 C1 C6 1.78(19) . . . . ?
O3 S1 N1 C7 113.1(2) . . . . ?
O2 S1 N1 C7 -116.61(19) . . . . ?
C1 S1 N1 C7 -2.5(2) . . . . ?
O3 S1 N1 I1 -72.82(18) . . . . ?
O2 S1 N1 I1 57.48(17) . . . . ?
C1 S1 N1 I1 171.63(14) . . . . ?
N2 I1 N1 C7 -107(3) . . . . ?
N2 I1 N1 S1 80(3) . . . . ?
N1 I1 N2 C8 -5(3) . . . . ?
N1 I1 N2 C10 170(3) . . . . ?
C2 C1 C6 C5 0.1(4) . . . . ?
S1 C1 C6 C5 -179.19(19) . . . . ?
C2 C1 C6 C7 178.6(2) . . . . ?
S1 C1 C6 C7 -0.7(3) . . . . ?
C8 N2 C10 C11 -0.9(4) . . . . ?
I1 N2 C10 C11 -176.0(2) . . . . ?
C13 N3 C12 C11 0.5(4) . . . . ?
C14 N3 C12 C11 -174.9(3) . . . . ?
C13 N3 C12 C9 179.2(3) . . . . ?
C14 N3 C12 C9 3.9(4) . . . . ?
C8 C9 C12 N3 -179.3(3) . . . . ?
C8 C9 C12 C11 -0.5(4) . . . . ?
C6 C1 C2 C3 -0.3(4) . . . . ?
S1 C1 C2 C3 178.9(2) . . . . ?
S1 N1 C7 O1 -178.0(2) . . . . ?
I1 N1 C7 O1 7.9(4) . . . . ?
S1 N1 C7 C6 2.4(3) . . . . ?
I1 N1 C7 C6 -171.71(15) . . . . ?
C1 C6 C7 O1 179.4(2) . . . . ?
C5 C6 C7 O1 -2.2(4) . . . . ?
C1 C6 C7 N1 -1.0(3) . . . . ?
C5 C6 C7 N1 177.4(2) . . . . ?
C5 C4 C3 C2 0.2(4) . . . . ?
C1 C2 C3 C4 0.1(4) . . . . ?
C10 N2 C8 C9 0.6(4) . . . . ?
I1 N2 C8 C9 175.9(2) . . . . ?
C12 C9 C8 N2 0.1(4) . . . . ?
N2 C10 C11 C12 0.5(4) . . . . ?
N3 C12 C11 C10 179.0(3) . . . . ?
C9 C12 C11 C10 0.2(4) . . . . ?
C3 C4 C5 C6 -0.3(4) . . . . ?
C1 C6 C5 C4 0.2(4) . . . . ?
C7 C6 C5 C4 -178.1(2) . . . . ?
 
_diffrn_measured_fraction_theta_max    0.992
_diffrn_reflns_theta_full              27.45
_diffrn_measured_fraction_theta_full   0.992
_refine_diff_density_max    0.478
_refine_diff_density_min   -0.454
_refine_diff_density_rms    0.132


#===END
